# Supplementary material for: Profiles of telomeric repeats in Insecta reveal diverse forms of telomeric motifs in Hymenopterans
Source: Life Sci Alliance. 2022 Apr 1;5(7):e202101163. doi: 10.26508/lsa.202101163 (PMC8977481; doi:10.26508/lsa.202101163)
Supplement: Supplemental Data 7. — The listed of data source and accession numbers for all genome datasets used in this research. [file LSA-2021-01163_Supplemental_Data_7.xlsx]

## Sheet: data_accession
Data S7. The records of public data used in this research.
scientific_name	code	study_accession	sample_accession	experiment_accession	run_accession	tax_id
Aedes albopictus	AEDAL	PRJNA275735	SAMN03352290	SRX882875	SRR1810047	7160
Aedes albopictus	AEDAL	PRJNA275735	SAMN03352290	SRX882875	SRR1810049	7160
Alloxysta arcuata	ALLAR	PRJEB13424	SAMEA3930558	ERX1430723	ERR1359252	1834406
Alloxysta arcuata	ALLAR	PRJEB13424	SAMEA3930557	ERX1430722	ERR1359251	1834406
Ammophila sabulosa	AMMSA	PRJNA607895	SAMN15376001	SRX8928189	SRR12432508	1088610
Amphinemura sulcicollis	AMPSU	PRJNA315680	SAMN04568201	SRX1642982	SRR3262386	143724
Andricus curvator	ANDCU	PRJEB20883	SAMEA104077433	ERX2042013	ERR1981607	75152
Andricus curvator	ANDCU	PRJEB20883	SAMEA104077433	ERX2042014	ERR1981608	75152
Andricus curvator	ANDCU	PRJEB20883	SAMEA104077433	ERX2042015	ERR1981609	75152
Andricus curvator	ANDCU	PRJEB20883	SAMEA104077433	ERX2042016	ERR1981610	75152
Andricus curvator	ANDCU	PRJEB20883	SAMEA104077433	ERX2042017	ERR1981611	75152
Andricus curvator	ANDCU	PRJEB20883	SAMEA104077433	ERX2042018	ERR1981612	75152
Andricus curvator	ANDCU	PRJEB20883	SAMEA104077433	ERX2042019	ERR1981613	75152
Andricus curvator	ANDCU	PRJEB20883	SAMEA104077433	ERX2042020	ERR1981614	75152
Andricus curvator	ANDCU	PRJEB20883	SAMEA104077433	ERX2042021	ERR1981615	75152
Andricus curvator	ANDCU	PRJEB20883	SAMEA104077433	ERX2042022	ERR1981616	75152
Andricus curvator	ANDCU	PRJEB20883	SAMEA104077433	ERX2042023	ERR1981617	75152
Andricus curvator	ANDCU	PRJEB20883	SAMEA104077433	ERX2042024	ERR1981618	75152
Andricus curvator	ANDCU	PRJEB20883	SAMEA104077434	ERX2042025	ERR1981619	75152
Andricus curvator	ANDCU	PRJEB20883	SAMEA104077434	ERX2042026	ERR1981620	75152
Andricus curvator	ANDCU	PRJEB20883	SAMEA104077434	ERX2042027	ERR1981621	75152
Andricus curvator	ANDCU	PRJEB20883	SAMEA104077434	ERX2042028	ERR1981622	75152
Andricus curvator	ANDCU	PRJEB20883	SAMEA104077434	ERX2042029	ERR1981623	75152
Andricus curvator	ANDCU	PRJEB20883	SAMEA104077434	ERX2042030	ERR1981624	75152
Andricus curvator	ANDCU	PRJEB20883	SAMEA104077434	ERX2042031	ERR1981625	75152
Andricus curvator	ANDCU	PRJEB20883	SAMEA104077434	ERX2042032	ERR1981626	75152
Andricus curvator	ANDCU	PRJEB20883	SAMEA104077434	ERX2042033	ERR1981627	75152
Andricus curvator	ANDCU	PRJEB20883	SAMEA104077434	ERX2042034	ERR1981628	75152
Andricus curvator	ANDCU	PRJEB20883	SAMEA104077434	ERX2042035	ERR1981629	75152
Andricus curvator	ANDCU	PRJEB20883	SAMEA104077434	ERX2042036	ERR1981630	75152
Andricus curvator	ANDCU	PRJEB20883	SAMEA104077435	ERX2042037	ERR1981631	75152
Andricus curvator	ANDCU	PRJEB20883	SAMEA104077435	ERX2042038	ERR1981632	75152
Andricus curvator	ANDCU	PRJEB20883	SAMEA104077435	ERX2042039	ERR1981633	75152
Andricus curvator	ANDCU	PRJEB20883	SAMEA104077435	ERX2042040	ERR1981634	75152
Andricus curvator	ANDCU	PRJEB20883	SAMEA104077435	ERX2042041	ERR1981635	75152
Andricus curvator	ANDCU	PRJEB20883	SAMEA104077435	ERX2042042	ERR1981636	75152
Andricus curvator	ANDCU	PRJEB20883	SAMEA104077435	ERX2042043	ERR1981637	75152
Andricus curvator	ANDCU	PRJEB20883	SAMEA104077435	ERX2042044	ERR1981638	75152
Andricus curvator	ANDCU	PRJEB20883	SAMEA104077435	ERX2042045	ERR1981639	75152
Andricus curvator	ANDCU	PRJEB20883	SAMEA104077435	ERX2042046	ERR1981640	75152
Andricus curvator	ANDCU	PRJEB20883	SAMEA104077435	ERX2042047	ERR1981641	75152
Andricus curvator	ANDCU	PRJEB20883	SAMEA104077435	ERX2042048	ERR1981642	75152
Andricus curvator	ANDCU	PRJEB20883	SAMEA104077436	ERX2042049	ERR1981643	75152
Andricus curvator	ANDCU	PRJEB20883	SAMEA104077436	ERX2042050	ERR1981644	75152
Andricus curvator	ANDCU	PRJEB20883	SAMEA104077436	ERX2042051	ERR1981645	75152
Andricus curvator	ANDCU	PRJEB20883	SAMEA104077436	ERX2042052	ERR1981646	75152
Andricus curvator	ANDCU	PRJEB20883	SAMEA104077436	ERX2042053	ERR1981647	75152
Andricus curvator	ANDCU	PRJEB20883	SAMEA104077436	ERX2042054	ERR1981648	75152
Andricus curvator	ANDCU	PRJEB20883	SAMEA104077436	ERX2042055	ERR1981649	75152
Andricus curvator	ANDCU	PRJEB20883	SAMEA104077436	ERX2042056	ERR1981650	75152
Andricus curvator	ANDCU	PRJEB20883	SAMEA104077436	ERX2042057	ERR1981651	75152
Andricus curvator	ANDCU	PRJEB20883	SAMEA104077436	ERX2042058	ERR1981652	75152
Andricus curvator	ANDCU	PRJEB20883	SAMEA104077436	ERX2042059	ERR1981653	75152
Andricus curvator	ANDCU	PRJEB20883	SAMEA104077436	ERX2042060	ERR1981654	75152
Anopheles gambiae	ANOGA	PRJNA171933	SAMN01096862	SRX174304	SRR534285	7165
Anopheles gambiae	ANOGA	PRJNA171933	SAMN01096864	SRX174311	SRR534286	7165
Anoplius infuscatus	ANOIN	PRJNA607895	SAMN15376005	SRX8928160	SRR12432537	2749338
Aphelinus certus	APHCE	PRJNA508982	SAMN10590809	SRX5122071	SRR8307569	1041456
Aphidius ervi	APHER	PRJNA540742	SAMN11554496	SRX7023006	SRR10311786	37627
Aphidius ervi	APHER	PRJNA540742	SAMN11554496	SRX5780573	SRR9001781	37627
Aphidius ervi	APHER	PRJNA540742	SAMN11554496	SRX5780574	SRR9326705	37627
Aphidius ervi	APHER	PRJNA540742	SAMN11554496	SRX6093754	SRR9326706	37627
Aphidius ervi	APHER	PRJNA540742	SAMN11554496	SRX6093755	SRR9326707	37627
Aphidius ervi	APHER	PRJNA540742	SAMN11554496	SRX6095882	SRR9329108	37627
Aphidius ervi	APHER	PRJNA540742	SAMN11554496	SRX6095881	SRR9329109	37627
Aphidius ervi	APHER	PRJNA540742	SAMN11554496	SRX6098242	SRR9331730	37627
Apis cerana japonica	APICE	PRJDB5799	SAMD00082726	DRX089203	DRR095707	292787
Apis cerana japonica	APICE	PRJDB5799	SAMD00082726	DRX089204	DRR095708	292787
Apis cerana japonica	APICE	PRJDB5799	SAMD00082726	DRX089205	DRR095709	292787
Apterogyna sp. za01	APTZA	PRJNA195615	SAMN02046632	SRX268538	SRR830777	1323571
Athalia rosae	ATHRO	PRJNA167403	SAMN02054463	SRX276605	SRR848931	37344
Athalia rosae	ATHRO	PRJNA167403	SAMN02054462	SRX276606	SRR848932	37344
Athalia rosae	ATHRO	PRJNA167403	SAMN02054465	SRX276607	SRR848933	37344
Athalia rosae	ATHRO	PRJNA167403	SAMN02054467	SRX276608	SRR848934	37344
Athalia rosae	ATHRO	PRJNA167403	SAMN02054466	SRX276609	SRR848935	37344
Aulacus striatus	AULST	PRJNA607895	SAMN14403617	SRX8492948	SRR11948532	2719049
Blattella asahinai	BLAAS	PRJNA545466	SAMN11893002	SRX5933246	SRR9160161	151327
Blastophaga nipponica	BLANI	PRJDB5116	SAMD00057887	DRX061543	DRR067623	142684
Blastophaga nipponica	BLANI	PRJDB5116	SAMD00057888	DRX061544	DRR067624	142684
Blastophaga nipponica	BLANI	PRJDB5116	SAMD00057889	DRX061545	DRR067625	142684
Blastophaga nipponica	BLANI	PRJDB5116	SAMD00057870	DRX061546	DRR067626	142684
Blastophaga nipponica	BLANI	PRJDB5116	SAMD00057871	DRX061547	DRR067627	142684
Blastophaga nipponica	BLANI	PRJDB5116	SAMD00057872	DRX061548	DRR067628	142684
Blastophaga nipponica	BLANI	PRJDB5116	SAMD00057875	DRX061549	DRR067629	142684
Blastophaga nipponica	BLANI	PRJDB5116	SAMD00057876	DRX061550	DRR067630	142684
Blastophaga nipponica	BLANI	PRJDB5116	SAMD00057877	DRX061551	DRR067631	142684
Blastophaga nipponica	BLANI	PRJDB5116	SAMD00057884	DRX061552	DRR067632	142684
Blastophaga nipponica	BLANI	PRJDB5116	SAMD00057885	DRX061553	DRR067633	142684
Blastophaga nipponica	BLANI	PRJDB5116	SAMD00057886	DRX061554	DRR067634	142684
Blastophaga nipponica	BLANI	PRJDB5116	SAMD00057902	DRX061555	DRR067635	142684
Blastophaga nipponica	BLANI	PRJDB5116	SAMD00057903	DRX061556	DRR067636	142684
Blastophaga nipponica	BLANI	PRJDB5116	SAMD00057904	DRX061557	DRR067637	142684
Blastophaga nipponica	BLANI	PRJDB5116	SAMD00057879	DRX061567	DRR067647	142684
Blastophaga nipponica	BLANI	PRJDB5116	SAMD00057880	DRX061568	DRR067648	142684
Blastophaga nipponica	BLANI	PRJDB5116	SAMD00057894	DRX061569	DRR067649	142684
Blastophaga nipponica	BLANI	PRJDB5116	SAMD00057898	DRX061570	DRR067650	142684
Blastophaga nipponica	BLANI	PRJDB5116	SAMD00057905	DRX061571	DRR067651	142684
Blastophaga nipponica	BLANI	PRJDB5116	SAMD00057906	DRX061572	DRR067652	142684
Blastophaga nipponica	BLANI	PRJDB5116	SAMD00057934	DRX061573	DRR067653	142684
Blastophaga nipponica	BLANI	PRJDB5116	SAMD00057935	DRX061574	DRR067654	142684
Blastophaga nipponica	BLANI	PRJDB5116	SAMD00057870	DRX061579	DRR067659	142684
Blastophaga nipponica	BLANI	PRJDB5116	SAMD00057871	DRX061580	DRR067660	142684
Blastophaga nipponica	BLANI	PRJDB5116	SAMD00057872	DRX061581	DRR067661	142684
Blastophaga nipponica	BLANI	PRJDB5116	SAMD00057875	DRX061582	DRR067662	142684
Blastophaga nipponica	BLANI	PRJDB5116	SAMD00057876	DRX061583	DRR067663	142684
Blastophaga nipponica	BLANI	PRJDB5116	SAMD00057877	DRX061584	DRR067664	142684
Blastophaga nipponica	BLANI	PRJDB5116	SAMD00057884	DRX061585	DRR067665	142684
Blastophaga nipponica	BLANI	PRJDB5116	SAMD00057885	DRX061586	DRR067666	142684
Blastophaga nipponica	BLANI	PRJDB5116	SAMD00057886	DRX061587	DRR067667	142684
Blastophaga nipponica	BLANI	PRJDB5116	SAMD00057887	DRX061588	DRR067668	142684
Blastophaga nipponica	BLANI	PRJDB5116	SAMD00057888	DRX061589	DRR067669	142684
Blastophaga nipponica	BLANI	PRJDB5116	SAMD00057889	DRX061590	DRR067670	142684
Blastophaga nipponica	BLANI	PRJDB5116	SAMD00057874	DRX061591	DRR067671	142684
Blastophaga nipponica	BLANI	PRJDB5116	SAMD00057878	DRX061592	DRR067672	142684
Blastophaga nipponica	BLANI	PRJDB5116	SAMD00057881	DRX061593	DRR067673	142684
Blastophaga nipponica	BLANI	PRJDB5116	SAMD00057882	DRX061594	DRR067674	142684
Blastophaga nipponica	BLANI	PRJDB5116	SAMD00057883	DRX061595	DRR067675	142684
Blastophaga nipponica	BLANI	PRJDB5116	SAMD00057891	DRX061596	DRR067676	142684
Blastophaga nipponica	BLANI	PRJDB5116	SAMD00057892	DRX061597	DRR067677	142684
Blastophaga nipponica	BLANI	PRJDB5116	SAMD00057893	DRX061598	DRR067678	142684
Blastophaga nipponica	BLANI	PRJDB5116	SAMD00057895	DRX061599	DRR067679	142684
Blastophaga nipponica	BLANI	PRJDB5116	SAMD00057896	DRX061600	DRR067680	142684
Blastophaga nipponica	BLANI	PRJDB5116	SAMD00057897	DRX061601	DRR067681	142684
Blastophaga nipponica	BLANI	PRJDB5116	SAMD00057899	DRX061602	DRR067682	142684
Blastophaga nipponica	BLANI	PRJDB5116	SAMD00057900	DRX061603	DRR067683	142684
Blastophaga nipponica	BLANI	PRJDB5116	SAMD00057901	DRX061604	DRR067684	142684
Blastophaga nipponica	BLANI	PRJDB5116	SAMD00057907	DRX061607	DRR067687	142684
Blastophaga nipponica	BLANI	PRJDB5116	SAMD00057908	DRX061608	DRR067688	142684
Blastophaga nipponica	BLANI	PRJDB5116	SAMD00057909	DRX061609	DRR067689	142684
Blastophaga nipponica	BLANI	PRJDB5116	SAMD00057910	DRX061610	DRR067690	142684
Blastophaga nipponica	BLANI	PRJDB5116	SAMD00057911	DRX061611	DRR067691	142684
Blastophaga nipponica	BLANI	PRJDB5116	SAMD00057912	DRX061612	DRR067692	142684
Blastophaga nipponica	BLANI	PRJDB5116	SAMD00057913	DRX061613	DRR067693	142684
Blastophaga nipponica	BLANI	PRJDB5116	SAMD00057914	DRX061614	DRR067694	142684
Blastophaga nipponica	BLANI	PRJDB5116	SAMD00057873	DRX061623	DRR067703	142684
Blastophaga nipponica	BLANI	PRJDB5116	SAMD00057890	DRX061624	DRR067704	142684
Blastophaga nipponica	BLANI	PRJDB5116	SAMD00057933	DRX061625	DRR067705	142684
Blastophaga nipponica	BLANI	PRJDB5116	SAMD00057915	DRX061638	DRR067718	142684
Blastophaga nipponica	BLANI	PRJDB5116	SAMD00057916	DRX061639	DRR067719	142684
Blastophaga nipponica	BLANI	PRJDB5116	SAMD00057917	DRX061640	DRR067720	142684
Blastophaga nipponica	BLANI	PRJDB5116	SAMD00057918	DRX061641	DRR067721	142684
Blastophaga nipponica	BLANI	PRJDB5116	SAMD00057919	DRX061642	DRR067722	142684
Blastophaga nipponica	BLANI	PRJDB5116	SAMD00057920	DRX061643	DRR067723	142684
Blastophaga nipponica	BLANI	PRJDB5116	SAMD00057921	DRX061644	DRR067724	142684
Blastophaga nipponica	BLANI	PRJDB5116	SAMD00057922	DRX061654	DRR067734	142684
Blastophaga nipponica	BLANI	PRJDB5116	SAMD00057923	DRX061655	DRR067735	142684
Blastophaga nipponica	BLANI	PRJDB5116	SAMD00057924	DRX061656	DRR067736	142684
Blastophaga nipponica	BLANI	PRJDB5116	SAMD00057925	DRX061670	DRR067750	142684
Blastophaga nipponica	BLANI	PRJDB5116	SAMD00057926	DRX061671	DRR067751	142684
Blastophaga nipponica	BLANI	PRJDB5116	SAMD00057927	DRX061672	DRR067752	142684
Blastophaga nipponica	BLANI	PRJDB5116	SAMD00057928	DRX061673	DRR067753	142684
Blastophaga nipponica	BLANI	PRJDB5116	SAMD00057929	DRX061674	DRR067754	142684
Blastophaga nipponica	BLANI	PRJDB5116	SAMD00057930	DRX061675	DRR067755	142684
Blastophaga nipponica	BLANI	PRJDB5116	SAMD00057931	DRX061676	DRR067756	142684
Blastophaga nipponica	BLANI	PRJDB5116	SAMD00057932	DRX061677	DRR067757	142684
Blastophaga nipponica	BLANI	PPRJDB5116	SAMD00057873	DRX061686	DRR067766	142684
Blastophaga nipponica	BLANI	PRJDB5116	SAMD00057890	DRX061687	DRR067767	142684
Blastophaga nipponica	BLANI	PRJDB5116	SAMD00057933	DRX061688	DRR067768	142684
Bombyx mori	BOMMO	PRJDB8323	SAMD00171775	DRX170025	DRR179499	7091
Bombyx mori	BOMMO	PRJDB8323	SAMD00171775	DRX170026	DRR179500	7091
Bombyx mori	BOMMO	PRJDB8323	SAMD00171777	DRX170027	DRR179501	7091
Bombyx mori	BOMMO	PRJDB8323	SAMD00171776	DRX170028	DRR179502	7091
Bombyx mori	BOMMO	PRJDB8323	SAMD00171776	DRX170029	DRR179503	7091
Bombyx mori	BOMMO	PRJDB8323	SAMD00171778	DRX170030	DRR179504	7091
Bombyx mori	BOMMO	PRJDB8323	SAMD00171778	DRX170031	DRR179505	7091
Bootanomyia dorsalis	BOODO	PRJEB20883	SAMEA104077493	ERX2042355	ERR1981949	1507335
Bootanomyia dorsalis	BOODO	PRJEB20883	SAMEA104077493	ERX2042356	ERR1981950	1507335
Bootanomyia dorsalis	BOODO	PRJEB20883	SAMEA104077494	ERX2042357	ERR1981951	1507335
Bootanomyia dorsalis	BOODO	PRJEB20883	SAMEA104077494	ERX2042358	ERR1981952	1507335
Bootanomyia dorsalis	BOODO	PRJEB20883	SAMEA104077495	ERX2042359	ERR1981953	1507335
Bootanomyia dorsalis	BOODO	PRJEB20883	SAMEA104077495	ERX2042360	ERR1981954	1507335
Bootanomyia dorsalis	BOODO	PRJEB20883	SAMEA104077496	ERX2042361	ERR1981955	1507335
Bootanomyia dorsalis	BOODO	PRJEB20883	SAMEA104077496	ERX2042362	ERR1981956	1507335
Bootanomyia dorsalis	BOODO	PRJEB20883	SAMEA104077497	ERX2042363	ERR1981957	1507335
Bootanomyia dorsalis	BOODO	PRJEB20883	SAMEA104077497	ERX2042364	ERR1981958	1507335
Bootanomyia dorsalis	BOODO	PRJEB20883	SAMEA104077498	ERX2042365	ERR1981959	1507335
Bootanomyia dorsalis	BOODO	PRJEB20883	SAMEA104077498	ERX2042366	ERR1981960	1507335
Bootanomyia dorsalis	BOODO	PRJEB20883	SAMEA104077499	ERX2042367	ERR1981961	1507335
Bootanomyia dorsalis	BOODO	PRJEB20883	SAMEA104077499	ERX2042368	ERR1981962	1507335
Bootanomyia dorsalis	BOODO	PRJEB20883	SAMEA104077500	ERX2042369	ERR1981963	1507335
Bootanomyia dorsalis	BOODO	PRJEB20883	SAMEA104077500	ERX2042370	ERR1981964	1507335
Bootanomyia dorsalis	BOODO	PRJEB20883	SAMEA104077501	ERX2042371	ERR1981965	1507335
Bootanomyia dorsalis	BOODO	PRJEB20883	SAMEA104077501	ERX2042372	ERR1981966	1507335
Bos taurus	BOSTA	PRJEB31621	SAMEA5605818	ERX3348425	ERR3323643	9913
Callirhytis sp. RG_2019_326	CALRG	PRJNA562060	SAMN13041666	SRX7007139	SRR10294308	2603378
Calopteryx splendens	CALSP	PRJNA315816	SAMN04994746	SRX1775908	SRR3547156	52612
Calopteryx splendens	CALSP	PRJNA315816	SAMN04994746	SRX1775909	SRR3547157	52612
Calopteryx splendens	CALSP	PRJNA315816	SAMN04994746	SRX1775910	SRR3547158	52612
Calopteryx splendens	CALSP	PRJNA315816	SAMN04994746	SRX1775911	SRR3547159	52612
Calopteryx splendens	CALSP	PRJNA315816	SAMN04994746	SRX1775912	SRR3547160	52612
Calopteryx splendens	CALSP	PRJNA315816	SAMN04994746	SRX1775913	SRR3547161	52612
Calopteryx splendens	CALSP	PRJNA315816	SAMN04994746	SRX1775914	SRR3547162	52612
Calopteryx splendens	CALSP	PRJNA315816	SAMN04994746	SRX1775915	SRR3547163	52612
Calopteryx splendens	CALSP	PRJNA315816	SAMN04994746	SRX1775908	SRR3590228	52612
Calopteryx splendens	CALSP	PRJNA315816	SAMN04994746	SRX1775910	SRR3590229	52612
Calopteryx splendens	CALSP	PRJNA315816	SAMN04994746	SRX1775911	SRR3590230	52612
Calopteryx splendens	CALSP	PRJNA315816	SAMN04994746	SRX1775912	SRR3590231	52612
Calopteryx splendens	CALSP	PRJNA315816	SAMN04994746	SRX1775914	SRR3590233	52612
Campodea augens	CAMAU	PRJNA416902	SAMN07967199	SRX3424046	SRR6324286	438502
Campodea augens	CAMAU	PRJNA416902	SAMN07967199	SRX3424045	SRR6324287	438502
Campodea augens	CAMAU	PRJNA416902	SAMN07967199	SRX3424044	SRR6324288	438502
Campodea augens	CAMAU	PRJNA416902	SAMN07967199	SRX3424043	SRR6324289	438502
Campodea augens	CAMAU	PRJNA416902	SAMN07967199	SRX3424042	SRR6324290	438502
Campodea augens	CAMAU	PRJNA416902	SAMN07967199	SRX3424041	SRR6324291	438502
Campodea augens	CAMAU	PRJNA416902	SAMN07967199	SRX3424040	SRR6324292	438502
Campodea augens	CAMAU	PRJNA416902	SAMN07967199	SRX3424039	SRR6324293	438502
Canis lupus familiaris	CANLU	PRJNA512874	SAMN10749847	SRX7910633	SRR11305493	9615
Canis lupus familiaris	CANLU	PRJNA512874	SAMN10689944	SRX5314338	SRR8510691	9615
Cataglyphis niger	CATNI	PRJNA494690	SAMN13050750	SRX7015010	SRR10302333	72791
Cataglyphis niger	CATNI	PRJNA494690	SAMN10176808	SRX5647153	SRR8859650	72791
Cataglyphis niger	CATNI	PRJNA494690	SAMN10176808	SRX5647152	SRR8859651	72791
Cataglyphis niger	CATNI	PRJNA494690	SAMN10176808	SRX5647151	SRR8859652	72791
Cataglyphis niger	CATNI	PRJNA494690	SAMN11355248	SRX5650045	SRR8862631	72791
Cataglyphis niger	CATNI	PRJNA494690	SAMN11355248	SRX5650044	SRR8862632	72791
Cataglyphis niger	CATNI	PRJNA494690	SAMN11355249	SRX5650049	SRR8862636	72791
Cephus cinctus	CEPCI	PRJNA168335	SAMN02905554	SRX691988	SRR1946600	211228
Chironomus riparius	CHIRI	PRJEB15223	SAMEA4560833	ERX1813174	ERR1743968	315576
Chironomus riparius	CHIRI	PRJEB15223	SAMEA4560834	ERX1813175	ERR1743969	315576
Chironomus riparius	CHIRI	PRJEB15223	SAMEA4560835	ERX1813176	ERR1743970	315576
Chironomus riparius	CHIRI	PRJEB15223	SAMEA4560836	ERX1813177	ERR1743971	315576
Chironomus riparius	CHIRI	PRJEB15223	SAMEA4560837	ERX1813178	ERR1743972	315576
Chironomus riparius	CHIRI	PRJEB15223	SAMEA25743418	ERX1822211	ERR1754844	315576
Chironomus riparius	CHIRI	PRJEB15223	SAMEA25744168	ERX1822212	ERR1754845	315576
Chironomus riparius	CHIRI	PRJEB15223	SAMEA25744918	ERX1826815	ERR1760495	315576
Chironomus riparius	CHIRI	PRJEB15223	SAMEA25745668	ERX1826816	ERR1760496	315576
Chrysoperla carnea	CHRCA	PRJNA506348	SAMN10458231	SRX5058889	SRR8240637	189513
Chrysis ignita	CHRIG	PRJNA607895	SAMN15376059	SRX8928185	SRR12432512	212613
Chrysina resplendens	CHRRE	PRJNA341359	SAMN06220490	SRX2486965	SRR5170512	1897488
Chrysina resplendens	CHRRE	PRJNA341359	SAMN06220490	SRX3989094	SRR7058111	1897488
Chrysina resplendens	CHRRE	PRJNA341359	SAMN06220490	SRX5676343	SRR8890674	1897488
Cloeon dipterum	CLODI	PRJEB34721	SAMEA6086026	ERX3774418	ERR3772661	197152
Cloeon dipterum	CLODI	PRJEB34721	SAMEA6086026	ERX3774417	ERR3772660	197152
Coenagrion scitulum	COESC	PRJNA297226	SAMN04120128	SRX1294645	SRR2540070	638470
Copidosoma floridanum	COPFL	PRJNA171748	SAMN02265491	SRX330854	SRR947007	29053
Copidosoma floridanum	COPFL	PRJNA171748	SAMN02265491	SRX330855	SRR947008	29053
Copidosoma floridanum	COPFL	PRJNA171748	SAMN02265491	SRX330856	SRR947009	29053
Copidosoma floridanum	COPFL	PRJNA171748	SAMN02265491	SRX330856	SRR947010	29053
Copidosoma floridanum	COPFL	PRJNA171748	SAMN02265491	SRX330857	SRR947011	29053
Copidosoma floridanum	COPFL	PRJNA171748	SAMN02265491	SRX330857	SRR947012	29053
Copidosoma floridanum	COPFL	PRJNA171748	SAMN02265491	SRX330854	SRR947013	29053
Cotesia vestalis	COTVE	PRJNA307296	SAMN04378091	SRX3452883	SRR6356303	217443
Cryptotermes secundus	CRYSE	PRJNA381866	SAMN06690155	SRX2870932	SRR5630826	105785
Danio rerio	DANRE	PRJNA292113	SAMN03964926	SRX1150432	SRR2165746	7955
Dasypogon diadema	DASDI	PRJNA361480	SAMN10022830	SRX4717188	SRR7878513	468822
Dasypogon diadema	DASDI	PRJNA361480	SAMN10022830	SRX4717189	SRR7878512	468822
Diachasma alloeum	DIAAL	PRJNA284396	SAMN03701895	SRX1038713	SRR2042503	454923
Diachasma alloeum	DIAAL	PRJNA284396	SAMN03701895	SRX1038750	SRR2042775	454923
Diachasma alloeum	DIAAL	PRJNA284396	SAMN03701895	SRX1038750	SRR2043489	454923
Diachasma alloeum	DIAAL	PRJNA284396	SAMN03701895	SRX1038752	SRR2043491	454923
Diachasma alloeum	DIAAL	PRJNA284396	SAMN03701895	SRX1038753	SRR2043616	454923
Diachasma alloeum	DIAAL	PRJNA284396	SAMN03701895	SRX1038753	SRR2043618	454923
Diachasma alloeum	DIAAL	PRJNA284396	SAMN03701895	SRX1041046	SRR2043726	454923
Diachasma alloeum	DIAAL	PRJNA284396	SAMN03701895	SRX1038749	SRR2046752	454923
Diadromus collaris	DIACO	PRJNA307299	SAMN04378100	SRX3443402	SRR6346140	7421
Diadromus collaris	DIACO	PRJNA307299	SAMN04378100	SRX3443401	SRR6346141	7421
Diadromus collaris	DIACO	PRJNA307299	SAMN04378100	SRX3443400	SRR6346142	7421
Diadromus collaris	DIACO	PRJNA307299	SAMN04378100	SRX3443399	SRR6346143	7421
Diadromus collaris	DIACO	PRJNA307299	SAMN04378100	SRX3443398	SRR6346144	7421
Diadromus collaris	DIACO	PRJNA307299	SAMN04378100	SRX3443397	SRR6346145	7421
Diadromus collaris	DIACO	PRJNA307299	SAMN04378100	SRX3443396	SRR6346146	7421
Diadegma semiclausum	DIASE	PRJNA307298	SAMN04378098	SRX3443408	SRR6346147	208481
Diadegma semiclausum	DIASE	PRJNA307298	SAMN04378098	SRX3443407	SRR6346148	208481
Diadegma semiclausum	DIASE	PRJNA307298	SAMN04378098	SRX3443406	SRR6346149	208481
Diadegma semiclausum	DIASE	PRJNA307298	SAMN04378098	SRX3443405	SRR6346150	208481
Diadegma semiclausum	DIASE	PRJNA307298	SAMN04378098	SRX3443404	SRR6346151	208481
Diadegma semiclausum	DIASE	PRJNA307298	SAMN04378098	SRX3443403	SRR6346152	208481
Diplolepis spinosa	DIPSP	PRJEB13424	SAMEA3930570	ERX1430779	ERR1359308	1834409
Diplolepis spinosa	DIPSP	PRJEB13424	SAMEA3930571	ERX1430780	ERR1359309	1834409
Diplolepis spinosa	DIPSP	PRJEB13424	SAMEA3930572	ERX1430781	ERR1359310	1834409
Diplolepis spinosa	DIPSP	PRJEB13424	SAMEA3930573	ERX1430782	ERR1359311	1834409
Diplolepis spinosa	DIPSP	PRJEB13424	SAMEA3930574	ERX1430783	ERR1359312	1834409
Dorylogaster longipes	DORLO	PRJNA342857	SAMN06220442	SRX8161083	SRR11594179	1886655
Dorylogaster longipes	DORLO	PRJNA342857	SAMN06220442	SRX2486712	SRR5170259	1886655
Dorylogaster longipes	DORLO	PRJNA342857	SAMN06220442	SRX4658143	SRR7806411	1886655
Dorylogaster longipes	DORLO	PRJNA342857	SAMN06220442	SRX5679125	SRR8892934	1886655
Dorylogaster longipes	DORLO	PRJNA342857	SAMN06220442	SRX6402874	SRR9640922	1886655
Drosophila melanogaster	DROME	PRJNA596258	SAMN13615994	SRX7400747	SRR10724612	7227
Drosophila melanogaster	DROME	PRJNA596258	SAMN13616203	SRX7402112	SRR10725992	7227
Drosophila melanogaster	DROME	PRJNA596258	SAMN13616081	SRX7402115	SRR10725995	7227
Drosophila melanogaster	DROME	PRJNA596258	SAMN13616204	SRX7405205	SRR10729085	7227
Drosophila melanogaster	DROME	PRJNA596258	SAMN13616207	SRX7405231	SRR10729111	7227
Drosophila melanogaster	DROME	PRJNA596258	SAMN13616208	SRX7405283	SRR10729163	7227
Drosophila melanogaster	DROME	PRJNA596258	SAMN13616285	SRX7405285	SRR10729165	7227
Drosophila melanogaster	DROME	PRJNA596258	SAMN13616284	SRX7405286	SRR10729166	7227
Drosophila melanogaster	DROME	PRJNA596258	SAMN13616281	SRX7405684	SRR10729564	7227
Drosophila melanogaster	DROME	PRJNA596258	SAMN13616286	SRX7405686	SRR10729566	7227
Drosophila melanogaster	DROME	PRJNA596258	SAMN13616287	SRX7409536	SRR10733526	7227
Drosophila melanogaster	DROME	PRJNA596258	SAMN13616282	SRX7410047	SRR10734210	7227
Drosophila melanogaster	DROME	PRJNA596258	SAMN13616283	SRX7411363	SRR10735526	7227
Ephemera danica	EPHDA	PRJNA171755	SAMN02264621	SRX330631	SRR946747	1049336
Ephemera danica	EPHDA	PRJNA171755	SAMN02264621	SRX330632	SRR946748	1049336
Ephemera danica	EPHDA	PRJNA171755	SAMN02264621	SRX330633	SRR946749	1049336
Ephemera danica	EPHDA	PRJNA171755	SAMN02264621	SRX330634	SRR946750	1049336
Equus caballus	EQUCA	PRJNA421018	SAMN02953672	SRX3469137	SRR6374293	9796
Eristalis dimidiata	ERIDI	PRJNA268391	SAMN03220553	SRX826525	SRR1738178	1352481
Eristalis dimidiata	ERIDI	PRJNA268391	SAMN03220552	SRX826524	SRR1738177	1352481
Eupelmus annulatus	EUPAN	PRJEB20883	SAMEA104077469	ERX2042268	ERR1981862	909778
Eupelmus annulatus	EUPAN	PRJEB20883	SAMEA104077469	ERX2042269	ERR1981863	909778
Eupelmus annulatus	EUPAN	PRJEB20883	SAMEA104077469	ERX2042270	ERR1981864	909778
Eupelmus annulatus	EUPAN	PRJEB20883	SAMEA104077470	ERX2042271	ERR1981865	909778
Eupelmus annulatus	EUPAN	PRJEB20883	SAMEA104077470	ERX2042272	ERR1981866	909778
Eupelmus annulatus	EUPAN	PRJEB20883	SAMEA104077470	ERX2042273	ERR1981867	909778
Eupelmus annulatus	EUPAN	PRJEB20883	SAMEA104077471	ERX2042274	ERR1981868	909778
Eupelmus annulatus	EUPAN	PRJEB20883	SAMEA104077471	ERX2042275	ERR1981869	909778
Eupelmus annulatus	EUPAN	PRJEB20883	SAMEA104077471	ERX2042276	ERR1981870	909778
Eupelmus annulatus	EUPAN	PRJEB20883	SAMEA104077472	ERX2042277	ERR1981871	909778
Eupelmus annulatus	EUPAN	PRJEB20883	SAMEA104077472	ERX2042278	ERR1981872	909778
Eupelmus annulatus	EUPAN	PRJEB20883	SAMEA104077472	ERX2042279	ERR1981873	909778
Eupelmus annulatus	EUPAN	PRJEB20883	SAMEA104077473	ERX2042280	ERR1981874	909778
Eupelmus annulatus	EUPAN	PRJEB20883	SAMEA104077473	ERX2042281	ERR1981875	909778
Eupelmus annulatus	EUPAN	PRJEB20883	SAMEA104077473	ERX2042282	ERR1981876	909778
Eupelmus annulatus	EUPAN	PRJEB20883	SAMEA104077474	ERX2042283	ERR1981877	909778
Eupelmus annulatus	EUPAN	PRJEB20883	SAMEA104077474	ERX2042284	ERR1981878	909778
Eupelmus annulatus	EUPAN	PRJEB20883	SAMEA104077474	ERX2042285	ERR1981879	909778
Euperipatoides rowelli	EUPRO	PRJNA203089	SAMN02644986	SRX976287	SRR1949920	49087
Euperipatoides rowelli	EUPRO	PRJNA203089	SAMN02644986	SRX976287	SRR1949921	49087
Euperipatoides rowelli	EUPRO	PRJNA203089	SAMN02644986	SRX976290	SRR1949922	49087
Euperipatoides rowelli	EUPRO	PRJNA203089	SAMN02644986	SRX976290	SRR1949923	49087
Euperipatoides rowelli	EUPRO	PRJNA203089	SAMN02644986	SRX976289	SRR1949924	49087
Euperipatoides rowelli	EUPRO	PRJNA203089	SAMN02644986	SRX976287	SRR1949925	49087
Euperipatoides rowelli	EUPRO	PRJNA203089	SAMN02644986	SRX976290	SRR1949926	49087
Euperipatoides rowelli	EUPRO	PRJNA203089	SAMN02644986	SRX976290	SRR1949927	49087
Euperipatoides rowelli	EUPRO	PRJNA203089	SAMN02644986	SRX976290	SRR1949928	49087
Euperipatoides rowelli	EUPRO	PRJNA203089	SAMN02644986	SRX976289	SRR1949929	49087
Euperipatoides rowelli	EUPRO	PRJNA203089	SAMN02644986	SRX976288	SRR1949930	49087
Euperipatoides rowelli	EUPRO	PRJNA203089	SAMN02644986	SRX976287	SRR1949931	49087
Euperipatoides rowelli	EUPRO	PRJNA203089	SAMN02644986	SRX976288	SRR1949932	49087
Euperipatoides rowelli	EUPRO	PRJNA203089	SAMN02644986	SRX976288	SRR1949933	49087
Euperipatoides rowelli	EUPRO	PRJNA203089	SAMN02644986	SRX976290	SRR1949934	49087
Euperipatoides rowelli	EUPRO	PRJNA203089	SAMN02644986	SRX976287	SRR1949935	49087
Euperipatoides rowelli	EUPRO	PRJNA203089	SAMN02644986	SRX976287	SRR1949936	49087
Euperipatoides rowelli	EUPRO	PRJNA203089	SAMN02644986	SRX976289	SRR1949937	49087
Eurytoma adleriae	EURAD	PRJEB20883	SAMEA104077460	ERX2042244	ERR1981838	1172129
Eurytoma adleriae	EURAD	PRJEB20883	SAMEA104077460	ERX2042245	ERR1981839	1172129
Eurytoma adleriae	EURAD	PRJEB20883	SAMEA104077460	ERX2042246	ERR1981840	1172129
Eurytoma adleriae	EURAD	PRJEB20883	SAMEA104077461	ERX2042247	ERR1981841	1172129
Eurytoma adleriae	EURAD	PRJEB20883	SAMEA104077461	ERX2042248	ERR1981842	1172129
Eurytoma adleriae	EURAD	PRJEB20883	SAMEA104077461	ERX2042249	ERR1981843	1172129
Eurytoma adleriae	EURAD	PRJEB20883	SAMEA104077462	ERX2042250	ERR1981844	1172129
Eurytoma adleriae	EURAD	PRJEB20883	SAMEA104077462	ERX2042251	ERR1981845	1172129
Eurytoma adleriae	EURAD	PRJEB20883	SAMEA104077462	ERX2042252	ERR1981846	1172129
Eurytoma adleriae	EURAD	PRJEB20883	SAMEA104077463	ERX2042253	ERR1981847	1172129
Eurytoma adleriae	EURAD	PRJEB20883	SAMEA104077463	ERX2042254	ERR1981848	1172129
Eurytoma adleriae	EURAD	PRJEB20883	SAMEA104077463	ERX2042255	ERR1981849	1172129
Eurytoma adleriae	EURAD	PRJEB20883	SAMEA104077464	ERX2042256	ERR1981850	1172129
Eurytoma adleriae	EURAD	PRJEB20883	SAMEA104077464	ERX2042257	ERR1981851	1172129
Eurytoma adleriae	EURAD	PRJEB20883	SAMEA104077465	ERX2042258	ERR1981852	1172129
Eurytoma adleriae	EURAD	PRJEB20883	SAMEA104077465	ERX2042259	ERR1981853	1172129
Eurytoma adleriae	EURAD	PRJEB20883	SAMEA104077466	ERX2042260	ERR1981854	1172129
Eurytoma adleriae	EURAD	PRJEB20883	SAMEA104077466	ERX2042261	ERR1981855	1172129
Eurytoma adleriae	EURAD	PRJEB20883	SAMEA104077467	ERX2042262	ERR1981856	1172129
Eurytoma adleriae	EURAD	PRJEB20883	SAMEA104077467	ERX2042263	ERR1981857	1172129
Eurytoma adleriae	EURAD	PRJEB20883	SAMEA104077467	ERX2042264	ERR1981858	1172129
Eurytoma adleriae	EURAD	PRJEB20883	SAMEA104077468	ERX2042265	ERR1981859	1172129
Eurytoma adleriae	EURAD	PRJEB20883	SAMEA104077468	ERX2042266	ERR1981860	1172129
Eurytoma adleriae	EURAD	PRJEB20883	SAMEA104077468	ERX2042267	ERR1981861	1172129
Euschistus heros	EUSHE	PRJNA489772	SAMN10131001	SRX4782131	SRR7948182	437493
Eyprepocnemis plorans	EYPPL	PRJNA304726	SAMN04306669	SRX1460023	SRR2970625	34655
Eyprepocnemis plorans	EYPPL	PRJNA304726	SAMN04306670	SRX1460025	SRR2970627	34655
Felis catus	FELCA	PRJNA557464	SAMN12412613	SRX6626077	SRR9873363	9685
Folsomia candida	FOLCA	PRJNA299291	SAMN04196550	SRX1356974	SRR2743547	158441
Fopius arisanus	FOPAR	PRJNA258104	SAMN03010499	SRX689044	SRR1560668	64838
Fopius arisanus	FOPAR	PRJNA258104	SAMN03010500	SRX689045	SRR1560673	64838
Fopius arisanus	FOPAR	PRJNA258104	SAMN03010501	SRX689047	SRR1560675	64838
Frankliniella occidentalis	FRAOC	PRJNA203209	SAMN02303501	SRX553955	SRR1300140	133901
Gallus gallus	GALGA	PRJNA13342	SAMN00000795	SRX000119	SRR000635	9031
Gallus gallus	GALGA	PRJNA13342	SAMN00000795	SRX000119	SRR000636	9031
Gallus gallus	GALGA	PRJNA13342	SAMN00000795	SRX000120	SRR000637	9031
Gallus gallus	GALGA	PRJNA13342	SAMN00000795	SRX000119	SRR000638	9031
Gallus gallus	GALGA	PRJNA13342	SAMN00000795	SRX000120	SRR000639	9031
Gallus gallus	GALGA	PRJNA13342	SAMN00000795	SRX000120	SRR000640	9031
Gallus gallus	GALGA	PRJNA13342	SAMN00000795	SRX000120	SRR000641	9031
Gallus gallus	GALGA	PRJNA13342	SAMN00000795	SRX000120	SRR000642	9031
Gallus gallus	GALGA	PRJNA13342	SAMN00000795	SRX000119	SRR000643	9031
Gallus gallus	GALGA	PRJNA13342	SAMN00000795	SRX000119	SRR000644	9031
Gallus gallus	GALGA	PRJNA13342	SAMN00000795	SRX000120	SRR000645	9031
Gallus gallus	GALGA	PRJNA13342	SAMN00000795	SRX000119	SRR000646	9031
Gallus gallus	GALGA	PRJNA13342	SAMN00216036	SRX043641	SRR105684	9031
Gallus gallus	GALGA	PRJNA13342	SAMN00216038	SRX043638	SRR105685	9031
Gallus gallus	GALGA	PRJNA13342	SAMN00216038	SRX043638	SRR105686	9031
Gallus gallus	GALGA	PRJNA13342	SAMN00216038	SRX043638	SRR105687	9031
Gallus gallus	GALGA	PRJNA13342	SAMN00216038	SRX043638	SRR105688	9031
Gallus gallus	GALGA	PRJNA13342	SAMN00216038	SRX043638	SRR105689	9031
Gallus gallus	GALGA	PRJNA13342	SAMN00216038	SRX043638	SRR105690	9031
Gallus gallus	GALGA	PRJNA13342	SAMN00216038	SRX043638	SRR105691	9031
Gallus gallus	GALGA	PRJNA13342	SAMN00216038	SRX043638	SRR105692	9031
Gallus gallus	GALGA	PRJNA13342	SAMN00216037	SRX043640	SRR105693	9031
Gallus gallus	GALGA	PRJNA13342	SAMN00216037	SRX043640	SRR105694	9031
Gallus gallus	GALGA	PRJNA13342	SAMN00216037	SRX043642	SRR105695	9031
Gallus gallus	GALGA	PRJNA13342	SAMN00216037	SRX043642	SRR105696	9031
Gallus gallus	GALGA	PRJNA13342	SAMN00216038	SRX043638	SRR105697	9031
Gallus gallus	GALGA	PRJNA13342	SAMN00216038	SRX043639	SRR105698	9031
Gallus gallus	GALGA	PRJNA13342	SAMN00216036	SRX043641	SRR105699	9031
Gallus gallus	GALGA	PRJNA13342	SAMN00216038	SRX043638	SRR105700	9031
Gallus gallus	GALGA	PRJNA13342	SAMN00216038	SRX043638	SRR105701	9031
Gallus gallus	GALGA	PRJNA13342	SAMN00216038	SRX043638	SRR105702	9031
Gallus gallus	GALGA	PRJNA13342	SAMN00216038	SRX043638	SRR105703	9031
Gallus gallus	GALGA	PRJNA13342	SAMN00216036	SRX043641	SRR105704	9031
Gallus gallus	GALGA	PRJNA13342	SAMN00216036	SRX043641	SRR105705	9031
Gallus gallus	GALGA	PRJNA13342	SAMN00216038	SRX043639	SRR105706	9031
Gallus gallus	GALGA	PRJNA13342	SAMN00216038	SRX043639	SRR105707	9031
Gallus gallus	GALGA	PRJNA13342	SAMN00216038	SRX043639	SRR105708	9031
Gallus gallus	GALGA	PRJNA13342	SAMN00216038	SRX043638	SRR105709	9031
Gallus gallus	GALGA	PRJNA13342	SAMN00216038	SRX043638	SRR105710	9031
Gallus gallus	GALGA	PRJNA13342	SAMN00216038	SRX043639	SRR105711	9031
Gallus gallus	GALGA	PRJNA13342	SAMN00216037	SRX043640	SRR105712	9031
Gallus gallus	GALGA	PRJNA13342	SAMN00216038	SRX043639	SRR105713	9031
Gallus gallus	GALGA	PRJNA13342	SAMN00216038	SRX043639	SRR105714	9031
Gallus gallus	GALGA	PRJNA13342	SAMN00216037	SRX043653	SRR105715	9031
Gallus gallus	GALGA	PRJNA13342	SAMN00216038	SRX043639	SRR105716	9031
Gallus gallus	GALGA	PRJNA13342	SAMN00216038	SRX043638	SRR105717	9031
Gallus gallus	GALGA	PRJNA13342	SAMN00216039	SRX043654	SRR105718	9031
Gallus gallus	GALGA	PRJNA13342	SAMN00216038	SRX043639	SRR105719	9031
Gallus gallus	GALGA	PRJNA13342	SAMN00216036	SRX043647	SRR105720	9031
Gallus gallus	GALGA	PRJNA13342	SAMN00216037	SRX043640	SRR105721	9031
Gallus gallus	GALGA	PRJNA13342	SAMN00216038	SRX043638	SRR105722	9031
Gallus gallus	GALGA	PRJNA13342	SAMN00216038	SRX043638	SRR105723	9031
Gallus gallus	GALGA	PRJNA13342	SAMN00216038	SRX043638	SRR105724	9031
Gallus gallus	GALGA	PRJNA13342	SAMN00216039	SRX043654	SRR105725	9031
Gallus gallus	GALGA	PRJNA13342	SAMN00216038	SRX043638	SRR105726	9031
Gallus gallus	GALGA	PRJNA13342	SAMN00216037	SRX043653	SRR105727	9031
Gallus gallus	GALGA	PRJNA13342	SAMN00216038	SRX043639	SRR105728	9031
Gallus gallus	GALGA	PRJNA13342	SAMN00216038	SRX043639	SRR105729	9031
Gallus gallus	GALGA	PRJNA13342	SAMN00216039	SRX043654	SRR105730	9031
Gallus gallus	GALGA	PRJNA13342	SAMN00216036	SRX043647	SRR105731	9031
Gallus gallus	GALGA	PRJNA13342	SAMN00216038	SRX043639	SRR105732	9031
Gallus gallus	GALGA	PRJNA13342	SAMN00216039	SRX043654	SRR105733	9031
Gallus gallus	GALGA	PRJNA13342	SAMN00216038	SRX043639	SRR105734	9031
Gallus gallus	GALGA	PRJNA13342	SAMN00216038	SRX043639	SRR105735	9031
Gallus gallus	GALGA	PRJNA13342	SAMN00216036	SRX043650	SRR105736	9031
Gallus gallus	GALGA	PRJNA13342	SAMN00216036	SRX043650	SRR105737	9031
Gallus gallus	GALGA	PRJNA13342	SAMN00216036	SRX043650	SRR105738	9031
Gallus gallus	GALGA	PRJNA13342	SAMN00216036	SRX043650	SRR105739	9031
Gallus gallus	GALGA	PRJNA13342	SAMN00216040	SRX043643	SRR105740	9031
Gallus gallus	GALGA	PRJNA13342	SAMN00216040	SRX043644	SRR105741	9031
Gallus gallus	GALGA	PRJNA13342	SAMN00216036	SRX043647	SRR105742	9031
Gallus gallus	GALGA	PRJNA13342	SAMN00216036	SRX043647	SRR105743	9031
Gallus gallus	GALGA	PRJNA13342	SAMN00216039	SRX043654	SRR105744	9031
Gallus gallus	GALGA	PRJNA13342	SAMN00216038	SRX043639	SRR105745	9031
Gallus gallus	GALGA	PRJNA13342	SAMN00216036	SRX043650	SRR105746	9031
Gallus gallus	GALGA	PRJNA13342	SAMN00216036	SRX043650	SRR105747	9031
Gallus gallus	GALGA	PRJNA13342	SAMN00216040	SRX043646	SRR105748	9031
Gallus gallus	GALGA	PRJNA13342	SAMN00216036	SRX043641	SRR105749	9031
Gallus gallus	GALGA	PRJNA13342	SAMN00216038	SRX043639	SRR105750	9031
Gallus gallus	GALGA	PRJNA13342	SAMN00216039	SRX043654	SRR105751	9031
Gallus gallus	GALGA	PRJNA13342	SAMN00216036	SRX043650	SRR105752	9031
Gallus gallus	GALGA	PRJNA13342	SAMN00216040	SRX043651	SRR105753	9031
Gallus gallus	GALGA	PRJNA13342	SAMN00216036	SRX043650	SRR105754	9031
Gallus gallus	GALGA	PRJNA13342	SAMN00216040	SRX043643	SRR105755	9031
Gallus gallus	GALGA	PRJNA13342	SAMN00216036	SRX043647	SRR105756	9031
Gallus gallus	GALGA	PRJNA13342	SAMN00216038	SRX043639	SRR105757	9031
Gallus gallus	GALGA	PRJNA13342	SAMN00216036	SRX043650	SRR105758	9031
Gallus gallus	GALGA	PRJNA13342	SAMN00216036	SRX043650	SRR105759	9031
Gallus gallus	GALGA	PRJNA13342	SAMN00216040	SRX043644	SRR105760	9031
Gallus gallus	GALGA	PRJNA13342	SAMN00216036	SRX043650	SRR105761	9031
Gallus gallus	GALGA	PRJNA13342	SAMN00216036	SRX043650	SRR105762	9031
Gallus gallus	GALGA	PRJNA13342	SAMN00216036	SRX043641	SRR105763	9031
Gallus gallus	GALGA	PRJNA13342	SAMN00216041	SRX043648	SRR105764	9031
Gallus gallus	GALGA	PRJNA13342	SAMN00216041	SRX043648	SRR105765	9031
Gallus gallus	GALGA	PRJNA13342	SAMN00216038	SRX043638	SRR105766	9031
Gallus gallus	GALGA	PRJNA13342	SAMN00216036	SRX043641	SRR105767	9031
Gallus gallus	GALGA	PRJNA13342	SAMN00216036	SRX043647	SRR105768	9031
Gallus gallus	GALGA	PRJNA13342	SAMN00216036	SRX043647	SRR105769	9031
Gallus gallus	GALGA	PRJNA13342	SAMN00216041	SRX043645	SRR105770	9031
Gallus gallus	GALGA	PRJNA13342	SAMN00216036	SRX043641	SRR105771	9031
Gallus gallus	GALGA	PRJNA13342	SAMN00216036	SRX043641	SRR105772	9031
Gallus gallus	GALGA	PRJNA13342	SAMN00216036	SRX043641	SRR105773	9031
Gallus gallus	GALGA	PRJNA13342	SAMN00216038	SRX043638	SRR105774	9031
Gallus gallus	GALGA	PRJNA13342	SAMN00216036	SRX043647	SRR105775	9031
Gallus gallus	GALGA	PRJNA13342	SAMN00216036	SRX043647	SRR105776	9031
Gallus gallus	GALGA	PRJNA13342	SAMN00216036	SRX043647	SRR105777	9031
Gallus gallus	GALGA	PRJNA13342	SAMN00216036	SRX043641	SRR105778	9031
Gallus gallus	GALGA	PRJNA13342	SAMN00216036	SRX043647	SRR105779	9031
Gallus gallus	GALGA	PRJNA13342	SAMN00216041	SRX043649	SRR105780	9031
Gallus gallus	GALGA	PRJNA13342	SAMN00216041	SRX043649	SRR105781	9031
Gallus gallus	GALGA	PRJNA13342	SAMN00216041	SRX043649	SRR105782	9031
Gallus gallus	GALGA	PRJNA13342	SAMN00216039	SRX043652	SRR105783	9031
Gallus gallus	GALGA	PRJNA13342	SAMN00216039	SRX043652	SRR105784	9031
Gallus gallus	GALGA	PRJNA13342	SAMN00216039	SRX043652	SRR105785	9031
Gallus gallus	GALGA	PRJNA13342	SAMN00216039	SRX043652	SRR105786	9031
Gallus gallus	GALGA	PRJNA13342	SAMN00216039	SRX043655	SRR105787	9031
Gallus gallus	GALGA	PRJNA13342	SAMN00216039	SRX043656	SRR105788	9031
Gallus gallus	GALGA	PRJNA13342	SAMN00216039	SRX043656	SRR105789	9031
Gallus gallus	GALGA	PRJNA13342	SAMN00216039	SRX043655	SRR105790	9031
Gallus gallus	GALGA	PRJNA13342	SAMN00216039	SRX043655	SRR105791	9031
Gallus gallus	GALGA	PRJNA13342	SAMN00216039	SRX043656	SRR105792	9031
Gallus gallus	GALGA	PRJNA13342	SAMN00216039	SRX043655	SRR105793	9031
Gallus gallus	GALGA	PRJNA13342	SAMN00216039	SRX043656	SRR105794	9031
Gallus gallus	GALGA	PRJNA13342	SAMN00216037	SRX043640	SRR107273	9031
Gallus gallus	GALGA	PRJNA13342	SAMN00216037	SRX043640	SRR107316	9031
Gallus gallus	GALGA	PRJNA13342	SAMN00216037	SRX043640	SRR107328	9031
Gallus gallus	GALGA	PRJNA13342	SAMN00216037	SRX043640	SRR107333	9031
Gallus gallus	GALGA	PRJNA13342	SAMN00216037	SRX043640	SRR107334	9031
Gallus gallus	GALGA	PRJNA13342	SAMN00216037	SRX043640	SRR107335	9031
Gallus gallus	GALGA	PRJNA13342	SAMN00216037	SRX043640	SRR107336	9031
Gallus gallus	GALGA	PRJNA13342	SAMN00216037	SRX043640	SRR107337	9031
Gallus gallus	GALGA	PRJNA13342	SAMN00216037	SRX043640	SRR107338	9031
Gallus gallus	GALGA	PRJNA13342	SAMN00216037	SRX043640	SRR107343	9031
Gallus gallus	GALGA	PRJNA13342	SAMN00216037	SRX043640	SRR107344	9031
Gallus gallus	GALGA	PRJNA13342	SAMN00216037	SRX043642	SRR107351	9031
Gallus gallus	GALGA	PRJNA13342	SAMN00216037	SRX043642	SRR107363	9031
Gallus gallus	GALGA	PRJNA13342	SAMN00216037	SRX043642	SRR107364	9031
Gallus gallus	GALGA	PRJNA13342	SAMN00216037	SRX043642	SRR107365	9031
Gallus gallus	GALGA	PRJNA13342	SAMN00216037	SRX043642	SRR107366	9031
Gallus gallus	GALGA	PRJNA13342	SAMN00216037	SRX043642	SRR107367	9031
Gallus gallus	GALGA	PRJNA13342	SAMN00216037	SRX043642	SRR107368	9031
Gallus gallus	GALGA	PRJNA13342	SAMN00216037	SRX043642	SRR107532	9031
Gallus gallus	GALGA	PRJNA13342	SAMN00216037	SRX043642	SRR107533	9031
Gallus gallus	GALGA	PRJNA13342	SAMN00216037	SRX043642	SRR107534	9031
Gallus gallus	GALGA	PRJNA13342	SAMN00216041	SRX044020	SRR107602	9031
Gallus gallus	GALGA	PRJNA13342	SAMN00216039	SRX061108	SRR197976	9031
Gallus gallus	GALGA	PRJNA13342	SAMN00216039	SRX061108	SRR197977	9031
Gallus gallus	GALGA	PRJNA13342	SAMN00216039	SRX061108	SRR197978	9031
Gallus gallus	GALGA	PRJNA13342	SAMN00216039	SRX061108	SRR197979	9031
Gallus gallus	GALGA	PRJNA13342	SAMN00216039	SRX061108	SRR197980	9031
Gallus gallus	GALGA	PRJNA13342	SAMN00216039	SRX061108	SRR197981	9031
Gallus gallus	GALGA	PRJNA13342	SAMN00216039	SRX061108	SRR197982	9031
Gallus gallus	GALGA	PRJNA13342	SAMN00216039	SRX043655	SRR197983	9031
Gallus gallus	GALGA	PRJNA13342	SAMN00216039	SRX043655	SRR197984	9031
Gallus gallus	GALGA	PRJNA13342	SAMN00216039	SRX043656	SRR197985	9031
Gallus gallus	GALGA	PRJNA13342	SAMN00216039	SRX043656	SRR197986	9031
Harmonia axyridis	HARAX	PRJDB6162	SAMD00089949	DRX093584	DRR100151	115357
Harmonia axyridis	HARAX	PRJDB6162	SAMD00089950	DRX093585	DRR100152	115357
Homo sapiens	HOMSA	PRJNA660888	SAMN15963188	SRX9161798	SRR12681648	9606
Hyposoter didymator	HYPDI	PRJNA589497	SAMN13282751	SRX7136290	SRR10441540	260305
Hyposoter didymator	HYPDI	PRJNA589497	SAMN13282751	SRX7136289	SRR10441541	260305
Hyposoter didymator	HYPDI	PRJNA589497	SAMN13282751	SRX7136288	SRR10441542	260305
Hyposoter didymator	HYPDI	PRJNA589497	SAMN13282751	SRX7136287	SRR10441543	260305
Hyposoter didymator	HYPDI	PRJNA589497	SAMN13282751	SRX7136286	SRR10441544	260305
Ibalia leucospoides	IBALE	PRJNA607895	SAMN14403616	SRX8046649	SRR11469919	32408
Labritermes buttelreepeni	LABBU	PRJNA560101	SAMN12568961	SRX6715950	SRR9968587	377922
Ladona fulva	LADFU	PRJNA194433	SAMN02178325	SRX288305	SRR870535	123851
Ladona fulva	LADFU	PRJNA194433	SAMN02178325	SRX288306	SRR870536	123851
Ladona fulva	LADFU	PRJNA194433	SAMN02178325	SRX288306	SRR870537	123851
Ladona fulva	LADFU	PRJNA194433	SAMN02178325	SRX288307	SRR870538	123851
Ladona fulva	LADFU	PRJNA194433	SAMN02178325	SRX288307	SRR870539	123851
Ladona fulva	LADFU	PRJNA194433	SAMN02178325	SRX288308	SRR870540	123851
Ladona fulva	LADFU	PRJNA194433	SAMN02178325	SRX288308	SRR870541	123851
Leptopilina boulardi	LEPBO	PRJNA429194	SAMN08329263	SRX7400769	SRR10724634	63433
Leptopilina heterotoma	LEPHE	PRJNA499032	SAMN10340731	SRX7401658	SRR10725523	63436
Libellula angelina	LIBAN	PRJNA514415	SAMN10724331	SRX5240287	SRR8432568	123845
Limnephilus lunatus	LIMLU	PRJNA203303	SAMN02211182	SRX330911	SRR947086	1218281
Limnephilus lunatus	LIMLU	PRJNA203303	SAMN02211182	SRX330911	SRR947087	1218281
Lysiphlebus fabarum	LYSFA	PRJNA505237	SAMN10417219	SRX5006729	SRR8186872	75917
Lysiphlebus fabarum	LYSFA	PRJNA505237	SAMN10417220	SRX5006728	SRR8186873	75917
Lysiphlebus fabarum	LYSFA	PRJNA505237	SAMN10417217	SRX5006727	SRR8186874	75917
Lysiphlebus fabarum	LYSFA	PRJNA505237	SAMN10417218	SRX5006726	SRR8186875	75917
Lysiphlebus fabarum	LYSFA	PRJNA505237	SAMN10417215	SRX5006725	SRR8186876	75917
Lysiphlebus fabarum	LYSFA	PRJNA505237	SAMN10417216	SRX5006724	SRR8186877	75917
Lysiphlebus fabarum	LYSFA	PRJNA505237	SAMN10417213	SRX5006723	SRR8186878	75917
Lysiphlebus fabarum	LYSFA	PRJNA505237	SAMN10417214	SRX5006722	SRR8186879	75917
Lysiphlebus fabarum	LYSFA	PRJNA505237	SAMN10417211	SRX5006721	SRR8186880	75917
Lysiphlebus fabarum	LYSFA	PRJNA505237	SAMN10417212	SRX5006720	SRR8186881	75917
Lysiphlebus fabarum	LYSFA	PRJNA505237	SAMN10417212	SRX5006719	SRR8186882	75917
Lysiphlebus fabarum	LYSFA	PRJNA505237	SAMN10417213	SRX5006718	SRR8186883	75917
Lysiphlebus fabarum	LYSFA	PRJNA505237	SAMN10417225	SRX5006717	SRR8186884	75917
Lysiphlebus fabarum	LYSFA	PRJNA505237	SAMN10417211	SRX5006716	SRR8186885	75917
Lysiphlebus fabarum	LYSFA	PRJNA505237	SAMN10417223	SRX5006715	SRR8186886	75917
Lysiphlebus fabarum	LYSFA	PRJNA505237	SAMN10417224	SRX5006714	SRR8186887	75917
Lysiphlebus fabarum	LYSFA	PRJNA505237	SAMN10417221	SRX5006713	SRR8186888	75917
Lysiphlebus fabarum	LYSFA	PRJNA505237	SAMN10417222	SRX5006712	SRR8186889	75917
Lysiphlebus fabarum	LYSFA	PRJNA505237	SAMN10417214	SRX5006711	SRR8186890	75917
Lysiphlebus fabarum	LYSFA	PRJNA505237	SAMN10417215	SRX5006710	SRR8186891	75917
Lysiphlebus fabarum	LYSFA	PRJNA505237	SAMN10417217	SRX5006709	SRR8186892	75917
Lysiphlebus fabarum	LYSFA	PRJNA505237	SAMN10417216	SRX5006708	SRR8186893	75917
Machilis hrabei	MACHR	PRJNA171753	SAMN02645830	SRX3189747	SRR6041650	438506
Machilis hrabei	MACHR	PRJNA171753	SAMN02645830	SRX3189747	SRR6041654	438506
Machilis hrabei	MACHR	PRJNA171753	SAMN02645830	SRX3189747	SRR6041655	438506
Marronus borbonicus	MARBO	PRJEB34604	SAMEA6168362	ERX3674739	ERR3685135	2654888
Marronus borbonicus	MARBO	PRJEB34604	SAMEA6168362	ERX3674740	ERR3685136	2654888
Marronus borbonicus	MARBO	PRJEB34604	SAMEA6168362	ERX3674741	ERR3685137	2654888
Marronus borbonicus	MARBO	PRJEB34604	SAMEA6168362	ERX3674742	ERR3685138	2654888
Marronus borbonicus	MARBO	PRJEB34604	SAMEA6463267	ERX3806211	ERR3804321	2654888
Megaselia abdita	MEGAB	PRJNA268391	SAMN03220566	SRX826536	SRR1738191	88686
Megaselia abdita	MEGAB	PRJNA268391	SAMN03220567	SRX826537	SRR1738192	88686
Megaselia scalaris	MEGSC	PRJNA183066	SAMN01823426	SRX208940	SRR629294	36166
Megaselia scalaris	MEGSC	PRJNA183066	SAMN01823426	SRX208940	SRR629486	36166
Megaselia scalaris	MEGSC	PRJNA183066	SAMN01823426	SRX209010	SRR629500	36166
Megastigmus stigmatizans	MEGST	PRJEB20883	SAMEA104077502	ERX2042373	ERR1981967	311874
Megastigmus stigmatizans	MEGST	PRJEB20883	SAMEA104077502	ERX2042374	ERR1981968	311874
Megastigmus stigmatizans	MEGST	PRJEB20883	SAMEA104077503	ERX2042375	ERR1981969	311874
Megastigmus stigmatizans	MEGST	PRJEB20883	SAMEA104077503	ERX2042376	ERR1981970	311874
Megastigmus stigmatizans	MEGST	PRJEB20883	SAMEA104077504	ERX2042377	ERR1981971	311874
Megastigmus stigmatizans	MEGST	PRJEB20883	SAMEA104077504	ERX2042378	ERR1981972	311874
Megastigmus stigmatizans	MEGST	PRJEB20883	SAMEA104077505	ERX2042379	ERR1981973	311874
Megastigmus stigmatizans	MEGST	PRJEB20883	SAMEA104077505	ERX2042380	ERR1981974	311874
Megastigmus stigmatizans	MEGST	PRJEB20883	SAMEA104077506	ERX2042381	ERR1981975	311874
Megastigmus stigmatizans	MEGST	PRJEB20883	SAMEA104077506	ERX2042382	ERR1981976	311874
Megastigmus stigmatizans	MEGST	PRJEB20883	SAMEA104077507	ERX2042383	ERR1981977	311874
Megastigmus stigmatizans	MEGST	PRJEB20883	SAMEA104077507	ERX2042384	ERR1981978	311874
Megastigmus stigmatizans	MEGST	PRJEB20883	SAMEA104077508	ERX2042385	ERR1981979	311874
Megastigmus stigmatizans	MEGST	PRJEB20883	SAMEA104077508	ERX2042386	ERR1981980	311874
Megastigmus stigmatizans	MEGST	PRJEB20883	SAMEA104077509	ERX2042387	ERR1981981	311874
Megastigmus stigmatizans	MEGST	PRJEB20883	SAMEA104077509	ERX2042388	ERR1981982	311874
Megastigmus stigmatizans	MEGST	PRJEB20883	SAMEA104077510	ERX2042389	ERR1981983	311874
Megastigmus stigmatizans	MEGST	PRJEB20883	SAMEA104077510	ERX2042390	ERR1981984	311874
Megastigmus stigmatizans	MEGST	PRJEB20883	SAMEA104077511	ERX2042391	ERR1981985	311874
Megastigmus stigmatizans	MEGST	PRJEB20883	SAMEA104077511	ERX2042392	ERR1981986	311874
Mellinus arvensis	MELAR	PRJNA607895	SAMN15376013	SRX8928190	SRR12432507	1507147
Microplitis demolitor	MICDE	PRJNA195937	SAMN02708865	SRX610757	SRR1425249	69319
Microplitis demolitor	MICDE	PRJNA195937	SAMN02708865	SRX641403	SRR1562865	69319
Microplitis demolitor	MICDE	PRJNA195937	SAMN02708865	SRX610757	SRR1562940	69319
Microplitis demolitor	MICDE	PRJNA195937	SAMN02708865	SRX610757	SRR1565751	69319
Microplitis demolitor	MICDE	PRJNA195937	SAMN02708865	SRX641469	SRR1931713	69319
Microplitis demolitor	MICDE	PRJNA195937	SAMN02708865	SRX641381	SRR1931742	69319
Microplitis demolitor	MICDE	PRJNA195937	SAMN02708865	SRX641469	SRR1931746	69319
Microplitis demolitor	MICDE	PRJNA195937	SAMN02708865	SRX641400	SRR1931750	69319
Microplitis demolitor	MICDE	PRJNA195937	SAMN02708865	SRX641403	SRR1951489	69319
Microplitis demolitor	MICDE	PRJNA195937	SAMN02708865	SRX981480	SRR1956518	69319
Microplitis demolitor	MICDE	PRJNA195937	SAMN02708865	SRX981480	SRR1956519	69319
Monodelphis domestica	MONDO	PRJNA216983	SAMN02333830	SRX339475	SRR958463	13616
Monodelphis domestica	MONDO	PRJNA216983	SAMN02333831	SRX339476	SRR958464	13616
Mus musculus	MUSMU	PRJNA60381	SAMN00190744	SRX037820	SRR091250	10090
Mus musculus	MUSMU	PRJNA60381	SAMN00190744	SRX037821	SRR091251	10090
Mus musculus	MUSMU	PRJNA60381	SAMN00190744	SRX037822	SRR091252	10090
Mus musculus	MUSMU	PRJNA60381	SAMN00190744	SRX037823	SRR091253	10090
Mus musculus	MUSMU	PRJNA60381	SAMN00190744	SRX037820	SRR091254	10090
Mus musculus	MUSMU	PRJNA60381	SAMN00190744	SRX037824	SRR091255	10090
Mus musculus	MUSMU	PRJNA60381	SAMN00190744	SRX037820	SRR091256	10090
Mus musculus	MUSMU	PRJNA60381	SAMN00190744	SRX037825	SRR091257	10090
Mus musculus	MUSMU	PRJNA60381	SAMN00190744	SRX037820	SRR091258	10090
Mus musculus	MUSMU	PRJNA60381	SAMN00190744	SRX037823	SRR091259	10090
Mus musculus	MUSMU	PRJNA60381	SAMN00190744	SRX037822	SRR091260	10090
Mus musculus	MUSMU	PRJNA60381	SAMN00190744	SRX037826	SRR091261	10090
Mus musculus	MUSMU	PRJNA60381	SAMN00190744	SRX037820	SRR091262	10090
Mus musculus	MUSMU	PRJNA60381	SAMN00190744	SRX037820	SRR091263	10090
Mus musculus	MUSMU	PRJNA60381	SAMN00190744	SRX037827	SRR091264	10090
Mus musculus	MUSMU	PRJNA60381	SAMN00190744	SRX037826	SRR091265	10090
Mus musculus	MUSMU	PRJNA60381	SAMN00190744	SRX037825	SRR091266	10090
Mus musculus	MUSMU	PRJNA60381	SAMN00190744	SRX037828	SRR091267	10090
Mus musculus	MUSMU	PRJNA60381	SAMN00190744	SRX037823	SRR091268	10090
Mus musculus	MUSMU	PRJNA60381	SAMN00190744	SRX037825	SRR091269	10090
Mus musculus	MUSMU	PRJNA60381	SAMN00190744	SRX037829	SRR091270	10090
Mus musculus	MUSMU	PRJNA60381	SAMN00190744	SRX037823	SRR091271	10090
Mus musculus	MUSMU	PRJNA60381	SAMN00190744	SRX037825	SRR091272	10090
Mus musculus	MUSMU	PRJNA60381	SAMN00190744	SRX037820	SRR091273	10090
Mus musculus	MUSMU	PRJNA60381	SAMN00190744	SRX037820	SRR091274	10090
Mus musculus	MUSMU	PRJNA60381	SAMN00190744	SRX037824	SRR091275	10090
Mus musculus	MUSMU	PRJNA60381	SAMN00190744	SRX041621	SRR099410	10090
Mus musculus	MUSMU	PRJNA60381	SAMN00190744	SRX041622	SRR099411	10090
Mus musculus	MUSMU	PRJNA60381	SAMN00190744	SRX041623	SRR099412	10090
Mus musculus	MUSMU	PRJNA60381	SAMN00190744	SRX041624	SRR099413	10090
Nesidiocoris tenuis	NESTE	PRJEB35378	SAMEA6452797	ERX3800554	ERR3798587	355587
Nesidiocoris tenuis	NESTE	PRJEB35378	SAMEA6452798	ERX3800664	ERR3798697	355587
Nesidiocoris tenuis	NESTE	PRJEB35378	SAMEA6452799	ERX3800665	ERR3798698	355587
Nesidiocoris tenuis	NESTE	PRJEB35378	SAMEA6450522	ERX3800807	ERR3798788	355587
Nesidiocoris tenuis	NESTE	PRJEB35378	SAMEA6505864	ERX3938928	ERR3931338	355587
Neuroterus quercusbaccarum	NEUQU	PRJEB20883	SAMEA104077512	ERX2042393	ERR1981987	351381
Neuroterus quercusbaccarum	NEUQU	PRJEB20883	SAMEA104077512	ERX2042394	ERR1981988	351381
Neuroterus quercusbaccarum	NEUQU	PRJEB20883	SAMEA104077512	ERX2042395	ERR1981989	351381
Neuroterus quercusbaccarum	NEUQU	PRJEB20883	SAMEA104077512	ERX2042396	ERR1981990	351381
Neuroterus quercusbaccarum	NEUQU	PRJEB20883	SAMEA104077512	ERX2042397	ERR1981991	351381
Neuroterus quercusbaccarum	NEUQU	PRJEB20883	SAMEA104077512	ERX2042398	ERR1981992	351381
Neuroterus quercusbaccarum	NEUQU	PRJEB20883	SAMEA104077512	ERX2042399	ERR1981993	351381
Neuroterus quercusbaccarum	NEUQU	PRJEB20883	SAMEA104077512	ERX2042400	ERR1981994	351381
Neuroterus quercusbaccarum	NEUQU	PRJEB20883	SAMEA104077512	ERX2042401	ERR1981995	351381
Neuroterus quercusbaccarum	NEUQU	PRJEB20883	SAMEA104077512	ERX2042402	ERR1981996	351381
Neuroterus quercusbaccarum	NEUQU	PRJEB20883	SAMEA104077512	ERX2042403	ERR1981997	351381
Neuroterus quercusbaccarum	NEUQU	PRJEB20883	SAMEA104077512	ERX2042404	ERR1981998	351381
Neuroterus quercusbaccarum	NEUQU	PRJEB20883	SAMEA104077513	ERX2042405	ERR1981999	351381
Neuroterus quercusbaccarum	NEUQU	PRJEB20883	SAMEA104077513	ERX2042406	ERR1982000	351381
Neuroterus quercusbaccarum	NEUQU	PRJEB20883	SAMEA104077513	ERX2042407	ERR1982001	351381
Neuroterus quercusbaccarum	NEUQU	PRJEB20883	SAMEA104077513	ERX2042408	ERR1982002	351381
Neuroterus quercusbaccarum	NEUQU	PRJEB20883	SAMEA104077513	ERX2042409	ERR1982003	351381
Neuroterus quercusbaccarum	NEUQU	PRJEB20883	SAMEA104077513	ERX2042410	ERR1982004	351381
Neuroterus quercusbaccarum	NEUQU	PRJEB20883	SAMEA104077513	ERX2042411	ERR1982005	351381
Neuroterus quercusbaccarum	NEUQU	PRJEB20883	SAMEA104077513	ERX2042412	ERR1982006	351381
Neuroterus quercusbaccarum	NEUQU	PRJEB20883	SAMEA104077513	ERX2042413	ERR1982007	351381
Neuroterus quercusbaccarum	NEUQU	PRJEB20883	SAMEA104077513	ERX2042414	ERR1982008	351381
Neuroterus quercusbaccarum	NEUQU	PRJEB20883	SAMEA104077513	ERX2042415	ERR1982009	351381
Neuroterus quercusbaccarum	NEUQU	PRJEB20883	SAMEA104077513	ERX2042416	ERR1982010	351381
Neuroterus quercusbaccarum	NEUQU	PRJEB20883	SAMEA104077514	ERX2042417	ERR1982011	351381
Neuroterus quercusbaccarum	NEUQU	PRJEB20883	SAMEA104077514	ERX2042418	ERR1982012	351381
Neuroterus quercusbaccarum	NEUQU	PRJEB20883	SAMEA104077514	ERX2042419	ERR1982013	351381
Neuroterus quercusbaccarum	NEUQU	PRJEB20883	SAMEA104077514	ERX2042420	ERR1982014	351381
Neuroterus quercusbaccarum	NEUQU	PRJEB20883	SAMEA104077514	ERX2042421	ERR1982015	351381
Neuroterus quercusbaccarum	NEUQU	PRJEB20883	SAMEA104077514	ERX2042422	ERR1982016	351381
Neuroterus quercusbaccarum	NEUQU	PRJEB20883	SAMEA104077514	ERX2042423	ERR1982017	351381
Neuroterus quercusbaccarum	NEUQU	PRJEB20883	SAMEA104077514	ERX2042424	ERR1982018	351381
Neuroterus quercusbaccarum	NEUQU	PRJEB20883	SAMEA104077514	ERX2042425	ERR1982019	351381
Neuroterus quercusbaccarum	NEUQU	PRJEB20883	SAMEA104077514	ERX2042426	ERR1982020	351381
Neuroterus quercusbaccarum	NEUQU	PRJEB20883	SAMEA104077514	ERX2042427	ERR1982021	351381
Neuroterus quercusbaccarum	NEUQU	PRJEB20883	SAMEA104077514	ERX2042428	ERR1982022	351381
Neuroterus quercusbaccarum	NEUQU	PRJEB20883	SAMEA104077515	ERX2042429	ERR1982023	351381
Neuroterus quercusbaccarum	NEUQU	PRJEB20883	SAMEA104077515	ERX2042430	ERR1982024	351381
Neuroterus quercusbaccarum	NEUQU	PRJEB20883	SAMEA104077515	ERX2042431	ERR1982025	351381
Neuroterus quercusbaccarum	NEUQU	PRJEB20883	SAMEA104077515	ERX2042432	ERR1982026	351381
Neuroterus quercusbaccarum	NEUQU	PRJEB20883	SAMEA104077515	ERX2042433	ERR1982027	351381
Neuroterus quercusbaccarum	NEUQU	PRJEB20883	SAMEA104077515	ERX2042434	ERR1982028	351381
Neuroterus quercusbaccarum	NEUQU	PRJEB20883	SAMEA104077515	ERX2042435	ERR1982029	351381
Neuroterus quercusbaccarum	NEUQU	PRJEB20883	SAMEA104077515	ERX2042436	ERR1982030	351381
Neuroterus quercusbaccarum	NEUQU	PRJEB20883	SAMEA104077515	ERX2042437	ERR1982031	351381
Neuroterus quercusbaccarum	NEUQU	PRJEB20883	SAMEA104077515	ERX2042438	ERR1982032	351381
Neuroterus quercusbaccarum	NEUQU	PRJEB20883	SAMEA104077515	ERX2042439	ERR1982033	351381
Neuroterus quercusbaccarum	NEUQU	PRJEB20883	SAMEA104077515	ERX2042440	ERR1982034	351381
Neuroterus quercusbaccarum	NEUQU	PRJEB20883	SAMEA104077516	ERX2042441	ERR1982035	351381
Neuroterus quercusbaccarum	NEUQU	PRJEB20883	SAMEA104077516	ERX2042442	ERR1982036	351381
Neuroterus quercusbaccarum	NEUQU	PRJEB20883	SAMEA104077516	ERX2042443	ERR1982037	351381
Neuroterus quercusbaccarum	NEUQU	PRJEB20883	SAMEA104077516	ERX2042444	ERR1982038	351381
Neuroterus quercusbaccarum	NEUQU	PRJEB20883	SAMEA104077516	ERX2042445	ERR1982039	351381
Neuroterus quercusbaccarum	NEUQU	PRJEB20883	SAMEA104077516	ERX2042446	ERR1982040	351381
Neuroterus quercusbaccarum	NEUQU	PRJEB20883	SAMEA104077516	ERX2042447	ERR1982041	351381
Neuroterus quercusbaccarum	NEUQU	PRJEB20883	SAMEA104077516	ERX2042448	ERR1982042	351381
Neuroterus quercusbaccarum	NEUQU	PRJEB20883	SAMEA104077516	ERX2042449	ERR1982043	351381
Neuroterus quercusbaccarum	NEUQU	PRJEB20883	SAMEA104077516	ERX2042450	ERR1982044	351381
Neuroterus quercusbaccarum	NEUQU	PRJEB20883	SAMEA104077516	ERX2042451	ERR1982045	351381
Neuroterus quercusbaccarum	NEUQU	PRJEB20883	SAMEA104077516	ERX2042452	ERR1982046	351381
Neuroterus quercusbaccarum	NEUQU	PRJEB20883	SAMEA104077517	ERX2042453	ERR1982047	351381
Neuroterus quercusbaccarum	NEUQU	PRJEB20883	SAMEA104077517	ERX2042454	ERR1982048	351381
Neuroterus quercusbaccarum	NEUQU	PRJEB20883	SAMEA104077517	ERX2042455	ERR1982049	351381
Neuroterus quercusbaccarum	NEUQU	PRJEB20883	SAMEA104077517	ERX2042456	ERR1982050	351381
Neuroterus quercusbaccarum	NEUQU	PRJEB20883	SAMEA104077517	ERX2042457	ERR1982051	351381
Neuroterus quercusbaccarum	NEUQU	PRJEB20883	SAMEA104077517	ERX2042458	ERR1982052	351381
Neuroterus quercusbaccarum	NEUQU	PRJEB20883	SAMEA104077517	ERX2042459	ERR1982053	351381
Neuroterus quercusbaccarum	NEUQU	PRJEB20883	SAMEA104077517	ERX2042460	ERR1982054	351381
Neuroterus quercusbaccarum	NEUQU	PRJEB20883	SAMEA104077517	ERX2042461	ERR1982055	351381
Neuroterus quercusbaccarum	NEUQU	PRJEB20883	SAMEA104077517	ERX2042462	ERR1982056	351381
Neuroterus quercusbaccarum	NEUQU	PRJEB20883	SAMEA104077517	ERX2042463	ERR1982057	351381
Neuroterus quercusbaccarum	NEUQU	PRJEB20883	SAMEA104077517	ERX2042464	ERR1982058	351381
Onthophagus taurus	ONTTA	PRJNA167478	SAMN02650359	SRX498131	SRR1201274	166361
Onthophagus taurus	ONTTA	PRJNA167478	SAMN02650359	SRX498133	SRR1201276	166361
Onthophagus taurus	ONTTA	PRJNA167478	SAMN02650359	SRX498134	SRR1201277	166361
Oobius primorskyensis	OOBPR	PRJNA314224	SAMN04530568	SRX1683876	SRR3341068	1810954
Oobius primorskyensis	OOBPR	PRJNA314224	SAMN04530568	SRX1683876	SRR3342197	1810954
Ormyrus nitidulus	ORMNI	PRJEB20883	SAMEA104077524	ERX2042537	ERR1982131	591002
Ormyrus nitidulus	ORMNI	PRJEB20883	SAMEA104077524	ERX2042538	ERR1982132	591002
Ormyrus nitidulus	ORMNI	PRJEB20883	SAMEA104077525	ERX2042539	ERR1982133	591002
Ormyrus nitidulus	ORMNI	PRJEB20883	SAMEA104077525	ERX2042540	ERR1982134	591002
Ormyrus nitidulus	ORMNI	PRJEB20883	SAMEA104077525	ERX2042541	ERR1982135	591002
Ormyrus nitidulus	ORMNI	PRJEB20883	SAMEA104077526	ERX2042542	ERR1982136	591002
Ormyrus nitidulus	ORMNI	PRJEB20883	SAMEA104077526	ERX2042543	ERR1982137	591002
Ormyrus nitidulus	ORMNI	PRJEB20883	SAMEA104077526	ERX2042544	ERR1982138	591002
Ormyrus nitidulus	ORMNI	PRJEB20883	SAMEA104077527	ERX2042545	ERR1982139	591002
Ormyrus nitidulus	ORMNI	PRJEB20883	SAMEA104077527	ERX2042546	ERR1982140	591002
Ormyrus nitidulus	ORMNI	PRJEB20883	SAMEA104077527	ERX2042547	ERR1982141	591002
Ormyrus nitidulus	ORMNI	PRJEB20883	SAMEA104077528	ERX2042548	ERR1982142	591002
Ormyrus nitidulus	ORMNI	PRJEB20883	SAMEA104077528	ERX2042549	ERR1982143	591002
Ormyrus nitidulus	ORMNI	PRJEB20883	SAMEA104077529	ERX2042550	ERR1982144	591002
Ormyrus nitidulus	ORMNI	PRJEB20883	SAMEA104077529	ERX2042551	ERR1982145	591002
Ormyrus nitidulus	ORMNI	PRJEB20883	SAMEA104077529	ERX2042552	ERR1982146	591002
Ormyrus nitidulus	ORMNI	PRJEB20883	SAMEA104077530	ERX2042553	ERR1982147	591002
Ormyrus nitidulus	ORMNI	PRJEB20883	SAMEA104077530	ERX2042554	ERR1982148	591002
Ormyrus nitidulus	ORMNI	PRJEB20883	SAMEA104077530	ERX2042555	ERR1982149	591002
Ormyrus nitidulus	ORMNI	PRJEB20883	SAMEA104077531	ERX2042556	ERR1982150	591002
Ormyrus nitidulus	ORMNI	PRJEB20883	SAMEA104077531	ERX2042557	ERR1982151	591002
Ormyrus nitidulus	ORMNI	PRJEB20883	SAMEA104077532	ERX2042558	ERR1982152	591002
Ormyrus nitidulus	ORMNI	PRJEB20883	SAMEA104077532	ERX2042559	ERR1982153	591002
Ormyrus nitidulus	ORMNI	PRJEB20883	SAMEA104077532	ERX2042560	ERR1982154	591002
Ormyrus nitidulus	ORMNI	PRJEB20883	SAMEA104077533	ERX2042561	ERR1982155	591002
Ormyrus nitidulus	ORMNI	PRJEB20883	SAMEA104077533	ERX2042562	ERR1982156	591002
Ormyrus pomaceus	ORMPO	PRJEB20883	SAMEA104077534	ERX2042563	ERR1982157	909788
Ormyrus pomaceus	ORMPO	PRJEB20883	SAMEA104077534	ERX2042564	ERR1982158	909788
Ormyrus pomaceus	ORMPO	PRJEB20883	SAMEA104077535	ERX2042565	ERR1982159	909788
Ormyrus pomaceus	ORMPO	PRJEB20883	SAMEA104077535	ERX2042566	ERR1982160	909788
Ormyrus pomaceus	ORMPO	PRJEB20883	SAMEA104077536	ERX2042567	ERR1982161	909788
Ormyrus pomaceus	ORMPO	PRJEB20883	SAMEA104077536	ERX2042568	ERR1982162	909788
Ormyrus pomaceus	ORMPO	PRJEB20883	SAMEA104077536	ERX2042569	ERR1982163	909788
Ormyrus pomaceus	ORMPO	PRJEB20883	SAMEA104077537	ERX2042570	ERR1982164	909788
Ormyrus pomaceus	ORMPO	PRJEB20883	SAMEA104077537	ERX2042571	ERR1982165	909788
Ormyrus pomaceus	ORMPO	PRJEB20883	SAMEA104077537	ERX2042572	ERR1982166	909788
Ormyrus pomaceus	ORMPO	PRJEB20883	SAMEA104077538	ERX2042573	ERR1982167	909788
Ormyrus pomaceus	ORMPO	PRJEB20883	SAMEA104077538	ERX2042574	ERR1982168	909788
Ormyrus pomaceus	ORMPO	PRJEB20883	SAMEA104077539	ERX2042575	ERR1982169	909788
Ormyrus pomaceus	ORMPO	PRJEB20883	SAMEA104077539	ERX2042576	ERR1982170	909788
Ormyrus pomaceus	ORMPO	PRJEB20883	SAMEA104077540	ERX2042577	ERR1982171	909788
Ormyrus pomaceus	ORMPO	PRJEB20883	SAMEA104077540	ERX2042578	ERR1982172	909788
Ormyrus pomaceus	ORMPO	PRJEB20883	SAMEA104077540	ERX2042579	ERR1982173	909788
Ormyrus pomaceus	ORMPO	PRJEB20883	SAMEA104077541	ERX2042580	ERR1982174	909788
Ormyrus pomaceus	ORMPO	PRJEB20883	SAMEA104077541	ERX2042581	ERR1982175	909788
Ormyrus pomaceus	ORMPO	PRJEB20883	SAMEA104077541	ERX2042582	ERR1982176	909788
Ormyrus pomaceus	ORMPO	PRJEB20883	SAMEA104077542	ERX2042583	ERR1982177	909788
Ormyrus pomaceus	ORMPO	PRJEB20883	SAMEA104077542	ERX2042584	ERR1982178	909788
Orussus abietinus	ORUAB	PRJNA171756	SAMN02225314	SRX330912	SRR947089	222816
Orussus abietinus	ORUAB	PRJNA171756	SAMN02225314	SRX330913	SRR947090	222816
Orussus abietinus	ORUAB	PRJNA171756	SAMN02225314	SRX330914	SRR947091	222816
Orussus abietinus	ORUAB	PRJNA171756	SAMN02225314	SRX330915	SRR947092	222816
Oryctes minor	ORYMI	PRJEB36751	SAMEA6565221	ERX3940310	ERR3932720	2709814
Oryctes minor	ORYMI	PRJEB36751	SAMEA6565221	ERX3940315	ERR3932725	2709814
Parameletus columbiae	PARCO	PRJNA433159	SAMN08458071	SRX3661042	SRR6684742	241039
Paraleptophlebia vaciva	PARVA	PRJNA433159	SAMN08458072	SRX3661041	SRR6684743	309557
Pediculus humanus	PEDHU	PRJNA349478	SAMN05930906	SRX2405461	SRR5088472	121225
Pediculus humanus	PEDHU	PRJNA349478	SAMN05930905	SRX2405460	SRR5088471	121225
Phaenoglyphis villosa	PHAVI	PRJEB13424	SAMEA3925676	ERX1428163	ERR1356688	1345142
Phaenoglyphis villosa	PHAVI	PRJEB13424	SAMEA3925675	ERX1428162	ERR1356687	1345142
Philanthus triangulum	PHITR	PRJNA607895	SAMN15375957	SRX8928192	SRR12432505	280486
Phryxe vulgaris	PHRVU	PRJNA607895	SAMN14403612	SRX8046645	SRR11469923	1918158
Phylacinus fisheri	PHYFI	PRJNA443422	SAMN08769044	SRX3848123	SRR6898367	2136807
Phytosciara flavipes	PHYFL	PRJNA369255	SAMN06282497	SRX2528140	SRR5217995	1260839
Phytosciara flavipes	PHYFL	PRJNA369255	SAMN06282497	SRX5354574	SRR8552797	1260839
Phytosciara flavipes	PHYFL	PRJNA369255	SAMN06282497	SRX5683012	SRR8896890	1260839
Phytosciara flavipes	PHYFL	PRJNA369255	SAMN06282497	SRX6406217	SRR9644404	1260839
Pleistodontes nigriventris	PLENI	PRJEB35527	SAMEA6245382	ERX3669876	ERR3680257	108974
Pleistodontes nigriventris	PLENI	PRJEB35527	SAMEA6245382	ERX3669877	ERR3680258	108974
Pleistodontes nigriventris	PLENI	PRJEB35527	SAMEA6245383	ERX3669878	ERR3680259	108974
Pleistodontes nigriventris	PLENI	PRJEB35527	SAMEA6245383	ERX3669879	ERR3680260	108974
Pleistodontes nigriventris	PLENI	PRJEB35527	SAMEA6245384	ERX3669880	ERR3680261	108974
Pleistodontes nigriventris	PLENI	PRJEB35527	SAMEA6245384	ERX3669881	ERR3680262	108974
Pleistodontes nigriventris	PLENI	PRJEB35527	SAMEA6245385	ERX3669882	ERR3680263	108974
Pleistodontes nigriventris	PLENI	PRJEB35527	SAMEA6245385	ERX3669883	ERR3680264	108974
Polistes carolina	POLCA	PRJNA482994	SAMN09728981	SRX4478072	SRR7613504	91413
Polistes carolina	POLCA	PRJNA482994	SAMN09728982	SRX4478071	SRR7613505	91413
Polistes carolina	POLCA	PRJNA482994	SAMN09728975	SRX4478070	SRR7613506	91413
Polistes carolina	POLCA	PRJNA482994	SAMN09728976	SRX4478069	SRR7613507	91413
Polistes carolina	POLCA	PRJNA482994	SAMN09728973	SRX4478068	SRR7613508	91413
Polistes carolina	POLCA	PRJNA482994	SAMN09728974	SRX4478067	SRR7613509	91413
Polistes carolina	POLCA	PRJNA482994	SAMN09728979	SRX4478066	SRR7613510	91413
Polistes carolina	POLCA	PRJNA482994	SAMN09728980	SRX4478065	SRR7613511	91413
Polistes carolina	POLCA	PRJNA482994	SAMN09728977	SRX4478064	SRR7613512	91413
Polistes carolina	POLCA	PRJNA482994	SAMN09728978	SRX4478063	SRR7613513	91413
Polistes carolina	POLCA	PRJNA482994	SAMN09728983	SRX4478051	SRR7613525	91413
Polistes carolina	POLCA	PRJNA482994	SAMN09728984	SRX4478052	SRR7613524	91413
Polistes carolina	POLCA	PRJNA482994	SAMN09728970	SRX4478026	SRR7613550	91413
Polistes carolina	POLCA	PRJNA482994	SAMN09728969	SRX4478025	SRR7613551	91413
Polistes carolina	POLCA	PRJNA482994	SAMN09728968	SRX4478024	SRR7613552	91413
Polistes carolina	POLCA	PRJNA482994	SAMN09728967	SRX4478023	SRR7613553	91413
Polistes carolina	POLCA	PRJNA482994	SAMN09728972	SRX4478022	SRR7613554	91413
Polistes carolina	POLCA	PRJNA482994	SAMN09728971	SRX4478021	SRR7613555	91413
Polistes dorsalis	POLDO	PRJNA482994	SAMN09728930	SRX4478092	SRR7613484	34729
Polistes dorsalis	POLDO	PRJNA482994	SAMN09728929	SRX4478091	SRR7613485	34729
Polistes dorsalis	POLDO	PRJNA482994	SAMN09728928	SRX4478090	SRR7613486	34729
Polistes dorsalis	POLDO	PRJNA482994	SAMN09728927	SRX4478089	SRR7613487	34729
Polistes dorsalis	POLDO	PRJNA482994	SAMN09728926	SRX4478088	SRR7613488	34729
Polistes dorsalis	POLDO	PRJNA482994	SAMN09728925	SRX4478087	SRR7613489	34729
Polistes dorsalis	POLDO	PRJNA482994	SAMN09728924	SRX4478086	SRR7613490	34729
Polistes dorsalis	POLDO	PRJNA482994	SAMN09728923	SRX4478085	SRR7613491	34729
Polistes dorsalis	POLDO	PRJNA482994	SAMN09728913	SRX4478082	SRR7613494	34729
Polistes dorsalis	POLDO	PRJNA482994	SAMN09728914	SRX4478081	SRR7613495	34729
Polistes dorsalis	POLDO	PRJNA482994	SAMN09728915	SRX4478080	SRR7613496	34729
Polistes dorsalis	POLDO	PRJNA482994	SAMN09728916	SRX4478079	SRR7613497	34729
Polistes dorsalis	POLDO	PRJNA482994	SAMN09728917	SRX4478078	SRR7613498	34729
Polistes dorsalis	POLDO	PRJNA482994	SAMN09728918	SRX4478077	SRR7613499	34729
Polistes dorsalis	POLDO	PRJNA482994	SAMN09728919	SRX4478076	SRR7613500	34729
Polistes dorsalis	POLDO	PRJNA482994	SAMN09728920	SRX4478075	SRR7613501	34729
Polistes dorsalis	POLDO	PRJNA482994	SAMN09728921	SRX4478074	SRR7613502	34729
Polistes dorsalis	POLDO	PRJNA482994	SAMN09728922	SRX4478073	SRR7613503	34729
Polistes fuscatus	POLFU	PRJNA482994	SAMN09728874	SRX4478122	SRR7613454	30207
Polistes fuscatus	POLFU	PRJNA482994	SAMN09728873	SRX4478121	SRR7613455	30207
Polistes fuscatus	POLFU	PRJNA482994	SAMN09728876	SRX4478120	SRR7613456	30207
Polistes fuscatus	POLFU	PRJNA482994	SAMN09728875	SRX4478119	SRR7613457	30207
Polistes fuscatus	POLFU	PRJNA482994	SAMN09728878	SRX4478118	SRR7613458	30207
Polistes fuscatus	POLFU	PRJNA482994	SAMN09728877	SRX4478117	SRR7613459	30207
Polistes fuscatus	POLFU	PRJNA482994	SAMN09728880	SRX4478116	SRR7613460	30207
Polistes fuscatus	POLFU	PRJNA482994	SAMN09728879	SRX4478115	SRR7613461	30207
Polistes fuscatus	POLFU	PRJNA482994	SAMN09728882	SRX4478114	SRR7613462	30207
Polistes fuscatus	POLFU	PRJNA482994	SAMN09728881	SRX4478113	SRR7613463	30207
Polistes fuscatus	POLFU	PRJNA482994	SAMN09728904	SRX4478112	SRR7613464	30207
Polistes fuscatus	POLFU	PRJNA482994	SAMN09728903	SRX4478111	SRR7613465	30207
Polistes fuscatus	POLFU	PRJNA482994	SAMN09728906	SRX4478110	SRR7613466	30207
Polistes fuscatus	POLFU	PRJNA482994	SAMN09728905	SRX4478109	SRR7613467	30207
Polistes fuscatus	POLFU	PRJNA482994	SAMN09728908	SRX4478108	SRR7613468	30207
Polistes fuscatus	POLFU	PRJNA482994	SAMN09728907	SRX4478107	SRR7613469	30207
Polistes fuscatus	POLFU	PRJNA482994	SAMN09728910	SRX4478106	SRR7613470	30207
Polistes fuscatus	POLFU	PRJNA482994	SAMN09728909	SRX4478105	SRR7613471	30207
Polistes fuscatus	POLFU	PRJNA482994	SAMN09728912	SRX4478104	SRR7613472	30207
Polistes fuscatus	POLFU	PRJNA482994	SAMN09728911	SRX4478103	SRR7613473	30207
Polistes fuscatus	POLFU	PRJNA482994	SAMN09728895	SRX4478102	SRR7613474	30207
Polistes fuscatus	POLFU	PRJNA482994	SAMN09728896	SRX4478101	SRR7613475	30207
Polistes fuscatus	POLFU	PRJNA482994	SAMN09728893	SRX4478100	SRR7613476	30207
Polistes fuscatus	POLFU	PRJNA482994	SAMN09728894	SRX4478099	SRR7613477	30207
Polistes fuscatus	POLFU	PRJNA482994	SAMN09728899	SRX4478098	SRR7613478	30207
Polistes fuscatus	POLFU	PRJNA482994	SAMN09728900	SRX4478097	SRR7613479	30207
Polistes fuscatus	POLFU	PRJNA482994	SAMN09728897	SRX4478096	SRR7613480	30207
Polistes fuscatus	POLFU	PRJNA482994	SAMN09728898	SRX4478095	SRR7613481	30207
Polistes fuscatus	POLFU	PRJNA482994	SAMN09728901	SRX4478094	SRR7613482	30207
Polistes fuscatus	POLFU	PRJNA482994	SAMN09728902	SRX4478093	SRR7613483	30207
Polistes fuscatus	POLFU	PRJNA482994	SAMN09728892	SRX4478040	SRR7613536	30207
Polistes fuscatus	POLFU	PRJNA482994	SAMN09728891	SRX4478039	SRR7613537	30207
Polistes fuscatus	POLFU	PRJNA482994	SAMN09728886	SRX4478038	SRR7613538	30207
Polistes fuscatus	POLFU	PRJNA482994	SAMN09728885	SRX4478037	SRR7613539	30207
Polistes fuscatus	POLFU	PRJNA482994	SAMN09728884	SRX4478036	SRR7613540	30207
Polistes fuscatus	POLFU	PRJNA482994	SAMN09728883	SRX4478035	SRR7613541	30207
Polistes fuscatus	POLFU	PRJNA482994	SAMN09728890	SRX4478034	SRR7613542	30207
Polistes fuscatus	POLFU	PRJNA482994	SAMN09728889	SRX4478033	SRR7613543	30207
Polistes fuscatus	POLFU	PRJNA482994	SAMN09728888	SRX4478032	SRR7613544	30207
Polistes fuscatus	POLFU	PRJNA482994	SAMN09728887	SRX4478031	SRR7613545	30207
Polistes gallicus	POLGA	PRJNA477544	SAMN09474112	SRX4300781	SRR7429978	34730
Polistes gallicus	POLGA	PRJNA477544	SAMN09474111	SRX4300780	SRR7429979	34730
Polistes metricus	POLME	PRJNA482994	SAMN09728932	SRX4478084	SRR7613492	91422
Polistes metricus	POLME	PRJNA482994	SAMN09728931	SRX4478083	SRR7613493	91422
Polistes metricus	POLME	PRJNA482994	SAMN09728948	SRX4478060	SRR7613516	91422
Polistes metricus	POLME	PRJNA482994	SAMN09728947	SRX4478059	SRR7613517	91422
Polistes metricus	POLME	PRJNA482994	SAMN09728949	SRX4478057	SRR7613519	91422
Polistes metricus	POLME	PRJNA482994	SAMN09728944	SRX4478056	SRR7613520	91422
Polistes metricus	POLME	PRJNA482994	SAMN09728943	SRX4478055	SRR7613521	91422
Polistes metricus	POLME	PRJNA482994	SAMN09728946	SRX4478054	SRR7613522	91422
Polistes metricus	POLME	PRJNA482994	SAMN09728945	SRX4478053	SRR7613523	91422
Polistes metricus	POLME	PRJNA482994	SAMN09728941	SRX4478050	SRR7613526	91422
Polistes metricus	POLME	PRJNA482994	SAMN09728942	SRX4478049	SRR7613527	91422
Polistes metricus	POLME	PRJNA482994	SAMN09728939	SRX4478048	SRR7613528	91422
Polistes metricus	POLME	PRJNA482994	SAMN09728940	SRX4478047	SRR7613529	91422
Polistes metricus	POLME	PRJNA482994	SAMN09728937	SRX4478046	SRR7613530	91422
Polistes metricus	POLME	PRJNA482994	SAMN09728938	SRX4478045	SRR7613531	91422
Polistes metricus	POLME	PRJNA482994	SAMN09728935	SRX4478044	SRR7613532	91422
Polistes metricus	POLME	PRJNA482994	SAMN09728936	SRX4478043	SRR7613533	91422
Polistes metricus	POLME	PRJNA482994	SAMN09728933	SRX4478042	SRR7613534	91422
Polistes metricus	POLME	PRJNA482994	SAMN09728934	SRX4478041	SRR7613535	91422
Polypedilum nubifer	POLNU	PRJDB2914	SAMD00020959	DRX021945	DRR024207	54969
Polistes perplexus	POLPE	PRJNA482994	SAMN09728961	SRX4478132	SRR7613444	268205
Polistes perplexus	POLPE	PRJNA482994	SAMN09728962	SRX4478131	SRR7613445	268205
Polistes perplexus	POLPE	PRJNA482994	SAMN09728957	SRX4478130	SRR7613446	268205
Polistes perplexus	POLPE	PRJNA482994	SAMN09728958	SRX4478129	SRR7613447	268205
Polistes perplexus	POLPE	PRJNA482994	SAMN09728959	SRX4478128	SRR7613448	268205
Polistes perplexus	POLPE	PRJNA482994	SAMN09728960	SRX4478127	SRR7613449	268205
Polistes perplexus	POLPE	PRJNA482994	SAMN09728953	SRX4478126	SRR7613450	268205
Polistes perplexus	POLPE	PRJNA482994	SAMN09728954	SRX4478125	SRR7613451	268205
Polistes perplexus	POLPE	PRJNA482994	SAMN09728955	SRX4478124	SRR7613452	268205
Polistes perplexus	POLPE	PRJNA482994	SAMN09728956	SRX4478123	SRR7613453	268205
Polistes perplexus	POLPE	PRJNA482994	SAMN09728952	SRX4478062	SRR7613514	268205
Polistes perplexus	POLPE	PRJNA482994	SAMN09728951	SRX4478061	SRR7613515	268205
Polistes perplexus	POLPE	PRJNA482994	SAMN09728950	SRX4478058	SRR7613518	268205
Polistes perplexus	POLPE	PRJNA482994	SAMN09728966	SRX4478030	SRR7613546	268205
Polistes perplexus	POLPE	PRJNA482994	SAMN09728965	SRX4478029	SRR7613547	268205
Polistes perplexus	POLPE	PRJNA482994	SAMN09728964	SRX4478028	SRR7613548	268205
Polistes perplexus	POLPE	PRJNA482994	SAMN09728963	SRX4478027	SRR7613549	268205
Polypedilum vanderplanki	POLVA	PRJDB1558	SAMD00020271	DRX022410	DRR024748	319348
Polypedilum vanderplanki	POLVA	PRJDB1558	SAMD00020271	DRX022411	DRR024749	319348
Polypedilum vanderplanki	POLVA	PRJDB1558	SAMD00020271	DRX022409	DRR024747	319348
Popillia japonica	POPJA	PRJNA358717	SAMN06180156	SRX6757313	SRR10019871	7064
Popillia japonica	POPJA	PRJNA358717	SAMN06180156	SRX6757446	SRR10020004	7064
Popillia japonica	POPJA	PRJNA358717	SAMN06180156	SRX2443296	SRR5129091	7064
Popillia japonica	POPJA	PRJNA358717	SAMN06180156	SRX3781639	SRR6825143	7064
Popillia japonica	POPJA	PRJNA358717	SAMN06180156	SRX5679330	SRR8893175	7064
Proctacanthus coquilletti	PROCO	PRJNA343047	SAMN05799370	SRX2213473	SRR4346725	1717472
Proctacanthus coquilletti	PROCO	PRJNA343047	SAMN05772833	SRX2225774	SRR4372731	1717472
Pseudoneuroterus saliens	PSESA	PRJEB20883	SAMEA104077518	ERX2042465	ERR1982059	207806
Pseudoneuroterus saliens	PSESA	PRJEB20883	SAMEA104077518	ERX2042466	ERR1982060	207806
Pseudoneuroterus saliens	PSESA	PRJEB20883	SAMEA104077518	ERX2042467	ERR1982061	207806
Pseudoneuroterus saliens	PSESA	PRJEB20883	SAMEA104077518	ERX2042468	ERR1982062	207806
Pseudoneuroterus saliens	PSESA	PRJEB20883	SAMEA104077518	ERX2042469	ERR1982063	207806
Pseudoneuroterus saliens	PSESA	PRJEB20883	SAMEA104077518	ERX2042470	ERR1982064	207806
Pseudoneuroterus saliens	PSESA	PRJEB20883	SAMEA104077518	ERX2042471	ERR1982065	207806
Pseudoneuroterus saliens	PSESA	PRJEB20883	SAMEA104077518	ERX2042472	ERR1982066	207806
Pseudoneuroterus saliens	PSESA	PRJEB20883	SAMEA104077518	ERX2042473	ERR1982067	207806
Pseudoneuroterus saliens	PSESA	PRJEB20883	SAMEA104077518	ERX2042474	ERR1982068	207806
Pseudoneuroterus saliens	PSESA	PRJEB20883	SAMEA104077518	ERX2042475	ERR1982069	207806
Pseudoneuroterus saliens	PSESA	PRJEB20883	SAMEA104077518	ERX2042476	ERR1982070	207806
Pseudoneuroterus saliens	PSESA	PRJEB20883	SAMEA104077519	ERX2042477	ERR1982071	207806
Pseudoneuroterus saliens	PSESA	PRJEB20883	SAMEA104077519	ERX2042478	ERR1982072	207806
Pseudoneuroterus saliens	PSESA	PRJEB20883	SAMEA104077519	ERX2042479	ERR1982073	207806
Pseudoneuroterus saliens	PSESA	PRJEB20883	SAMEA104077519	ERX2042480	ERR1982074	207806
Pseudoneuroterus saliens	PSESA	PRJEB20883	SAMEA104077519	ERX2042481	ERR1982075	207806
Pseudoneuroterus saliens	PSESA	PRJEB20883	SAMEA104077519	ERX2042482	ERR1982076	207806
Pseudoneuroterus saliens	PSESA	PRJEB20883	SAMEA104077519	ERX2042483	ERR1982077	207806
Pseudoneuroterus saliens	PSESA	PRJEB20883	SAMEA104077519	ERX2042484	ERR1982078	207806
Pseudoneuroterus saliens	PSESA	PRJEB20883	SAMEA104077519	ERX2042485	ERR1982079	207806
Pseudoneuroterus saliens	PSESA	PRJEB20883	SAMEA104077519	ERX2042486	ERR1982080	207806
Pseudoneuroterus saliens	PSESA	PRJEB20883	SAMEA104077519	ERX2042487	ERR1982081	207806
Pseudoneuroterus saliens	PSESA	PRJEB20883	SAMEA104077519	ERX2042488	ERR1982082	207806
Pseudoneuroterus saliens	PSESA	PRJEB20883	SAMEA104077520	ERX2042489	ERR1982083	207806
Pseudoneuroterus saliens	PSESA	PRJEB20883	SAMEA104077520	ERX2042490	ERR1982084	207806
Pseudoneuroterus saliens	PSESA	PRJEB20883	SAMEA104077520	ERX2042491	ERR1982085	207806
Pseudoneuroterus saliens	PSESA	PRJEB20883	SAMEA104077520	ERX2042492	ERR1982086	207806
Pseudoneuroterus saliens	PSESA	PRJEB20883	SAMEA104077520	ERX2042493	ERR1982087	207806
Pseudoneuroterus saliens	PSESA	PRJEB20883	SAMEA104077520	ERX2042494	ERR1982088	207806
Pseudoneuroterus saliens	PSESA	PRJEB20883	SAMEA104077520	ERX2042495	ERR1982089	207806
Pseudoneuroterus saliens	PSESA	PRJEB20883	SAMEA104077520	ERX2042496	ERR1982090	207806
Pseudoneuroterus saliens	PSESA	PRJEB20883	SAMEA104077520	ERX2042497	ERR1982091	207806
Pseudoneuroterus saliens	PSESA	PRJEB20883	SAMEA104077520	ERX2042498	ERR1982092	207806
Pseudoneuroterus saliens	PSESA	PRJEB20883	SAMEA104077520	ERX2042499	ERR1982093	207806
Pseudoneuroterus saliens	PSESA	PRJEB20883	SAMEA104077520	ERX2042500	ERR1982094	207806
Pseudoneuroterus saliens	PSESA	PRJEB20883	SAMEA104077521	ERX2042501	ERR1982095	207806
Pseudoneuroterus saliens	PSESA	PRJEB20883	SAMEA104077521	ERX2042502	ERR1982096	207806
Pseudoneuroterus saliens	PSESA	PRJEB20883	SAMEA104077521	ERX2042503	ERR1982097	207806
Pseudoneuroterus saliens	PSESA	PRJEB20883	SAMEA104077521	ERX2042504	ERR1982098	207806
Pseudoneuroterus saliens	PSESA	PRJEB20883	SAMEA104077521	ERX2042505	ERR1982099	207806
Pseudoneuroterus saliens	PSESA	PRJEB20883	SAMEA104077521	ERX2042506	ERR1982100	207806
Pseudoneuroterus saliens	PSESA	PRJEB20883	SAMEA104077521	ERX2042507	ERR1982101	207806
Pseudoneuroterus saliens	PSESA	PRJEB20883	SAMEA104077521	ERX2042508	ERR1982102	207806
Pseudoneuroterus saliens	PSESA	PRJEB20883	SAMEA104077521	ERX2042509	ERR1982103	207806
Pseudoneuroterus saliens	PSESA	PRJEB20883	SAMEA104077521	ERX2042510	ERR1982104	207806
Pseudoneuroterus saliens	PSESA	PRJEB20883	SAMEA104077521	ERX2042511	ERR1982105	207806
Pseudoneuroterus saliens	PSESA	PRJEB20883	SAMEA104077521	ERX2042512	ERR1982106	207806
Pseudoneuroterus saliens	PSESA	PRJEB20883	SAMEA104077522	ERX2042513	ERR1982107	207806
Pseudoneuroterus saliens	PSESA	PRJEB20883	SAMEA104077522	ERX2042514	ERR1982108	207806
Pseudoneuroterus saliens	PSESA	PRJEB20883	SAMEA104077522	ERX2042515	ERR1982109	207806
Pseudoneuroterus saliens	PSESA	PRJEB20883	SAMEA104077522	ERX2042516	ERR1982110	207806
Pseudoneuroterus saliens	PSESA	PRJEB20883	SAMEA104077522	ERX2042517	ERR1982111	207806
Pseudoneuroterus saliens	PSESA	PRJEB20883	SAMEA104077522	ERX2042518	ERR1982112	207806
Pseudoneuroterus saliens	PSESA	PRJEB20883	SAMEA104077522	ERX2042519	ERR1982113	207806
Pseudoneuroterus saliens	PSESA	PRJEB20883	SAMEA104077522	ERX2042520	ERR1982114	207806
Pseudoneuroterus saliens	PSESA	PRJEB20883	SAMEA104077522	ERX2042521	ERR1982115	207806
Pseudoneuroterus saliens	PSESA	PRJEB20883	SAMEA104077522	ERX2042522	ERR1982116	207806
Pseudoneuroterus saliens	PSESA	PRJEB20883	SAMEA104077522	ERX2042523	ERR1982117	207806
Pseudoneuroterus saliens	PSESA	PRJEB20883	SAMEA104077522	ERX2042524	ERR1982118	207806
Pseudoneuroterus saliens	PSESA	PRJEB20883	SAMEA104077523	ERX2042525	ERR1982119	207806
Pseudoneuroterus saliens	PSESA	PRJEB20883	SAMEA104077523	ERX2042526	ERR1982120	207806
Pseudoneuroterus saliens	PSESA	PRJEB20883	SAMEA104077523	ERX2042527	ERR1982121	207806
Pseudoneuroterus saliens	PSESA	PRJEB20883	SAMEA104077523	ERX2042528	ERR1982122	207806
Pseudoneuroterus saliens	PSESA	PRJEB20883	SAMEA104077523	ERX2042529	ERR1982123	207806
Pseudoneuroterus saliens	PSESA	PRJEB20883	SAMEA104077523	ERX2042530	ERR1982124	207806
Pseudoneuroterus saliens	PSESA	PRJEB20883	SAMEA104077523	ERX2042531	ERR1982125	207806
Pseudoneuroterus saliens	PSESA	PRJEB20883	SAMEA104077523	ERX2042532	ERR1982126	207806
Pseudoneuroterus saliens	PSESA	PRJEB20883	SAMEA104077523	ERX2042533	ERR1982127	207806
Pseudoneuroterus saliens	PSESA	PRJEB20883	SAMEA104077523	ERX2042534	ERR1982128	207806
Pseudoneuroterus saliens	PSESA	PRJEB20883	SAMEA104077523	ERX2042535	ERR1982129	207806
Pseudoneuroterus saliens	PSESA	PRJEB20883	SAMEA104077523	ERX2042536	ERR1982130	207806
Pteromalus puparum	PTEPU	PRJNA542765	SAMN14481816	SRX8022324	SRR11444500	32389
Pteromalus puparum	PTEPU	PRJNA542765	SAMN14481816	SRX8022323	SRR11444501	32389
Pteromalus puparum	PTEPU	PRJNA542765	SAMN14481816	SRX8022322	SRR11444502	32389
Pteromalus puparum	PTEPU	PRJNA542765	SAMN14481816	SRX8022321	SRR11444503	32389
Pteromalus puparum	PTEPU	PRJNA542765	SAMN14481816	SRX8022320	SRR11444504	32389
Rhinocypha anisoptera	RHIAN	PRJNA504960	SAMN13087359	SRX7036084	SRR10325889	2487776
Rhodnius pictipes	RHOPI	PRJNA429761	SAMN08359293	SRX3722662	SRR6749973	69253
Rhodnius pictipes	RHOPI	PRJNA429761	SAMN08359292	SRX3722661	SRR6749974	69253
Rhodnius pictipes	RHOPI	PRJNA429761	SAMN08359295	SRX3722660	SRR6749975	69253
Rhodnius pictipes	RHOPI	PRJNA429761	SAMN08359294	SRX3722659	SRR6749976	69253
Rhodnius pictipes	RHOPI	PRJNA429761	SAMN08359296	SRX3722665	SRR6749970	69253
Rhodnius prolixus	RHOPR	PRJNA429761	SAMN08359297	SRX3722666	SRR6749969	13249
Rhodnius prolixus	RHOPR	PRJNA429761	SAMN08359299	SRX3722664	SRR6749971	13249
Rhodnius prolixus	RHOPR	PRJNA429761	SAMN08359298	SRX3722663	SRR6749972	13249
Rhodnius prolixus	RHOPR	PRJNA429761	SAMN08359300	SRX3722657	SRR6749978	13249
Rhodnius robustus	RHORO	PRJNA429761	SAMN08359301	SRX3722658	SRR6749977	72490
Rhodnius robustus	RHORO	PRJNA429761	SAMN08359304	SRX3722652	SRR6749983	72490
Rhodnius robustus	RHORO	PRJNA429761	SAMN08359305	SRX3722651	SRR6749984	72490
Rhodnius robustus	RHORO	PRJNA429761	SAMN08359302	SRX3722650	SRR6749985	72490
Rhodnius robustus	RHORO	PRJNA429761	SAMN08359303	SRX3722649	SRR6749986	72490
Rhodnius robustus	RHORO	PRJNA429761	SAMN08359283	SRX3722647	SRR6749988	72490
Rhodnius robustus	RHORO	PRJNA429761	SAMN08359288	SRX3722642	SRR6749993	72490
Sapyga quinquepunctata	SAPQU	PRJNA607895	SAMN15376023	SRX8928159	SRR12432538	1507361
Sarcophaga peregrina	SARPE	PRJNA509973	SAMN10591797	SRX5225155	SRR8416036	7386
Solenopsis geminata	SOLGE	PRJNA396161	SAMN07421817	SRX3045159	SRR5877740	121131
Solenopsis geminata	SOLGE	PRJNA396161	SAMN07421817	SRX3045159	SRR5877741	121131
Solenopsis geminata	SOLGE	PRJNA396161	SAMN07421817	SRX3045159	SRR5877742	121131
Solenopsis geminata	SOLGE	PRJNA396161	SAMN07421817	SRX3045159	SRR5877743	121131
Solenopsis geminata	SOLGE	PRJNA396161	SAMN07421817	SRX4906759	SRR8079606	121131
Solenopsis invicta	SOLIN	PRJNA396161	SAMN10260428	SRX4907872	SRR8080725	13686
Solenopsis invicta	SOLIN	PRJNA396161	SAMN10260427	SRX4907871	SRR8080726	13686
Solenopsis invicta	SOLIN	PRJNA396161	SAMN10260426	SRX4907870	SRR8080727	13686
Solenopsis invicta	SOLIN	PRJNA396161	SAMN10260425	SRX4907869	SRR8080728	13686
Solenopsis invicta	SOLIN	PRJNA396161	SAMN10260424	SRX4907868	SRR8080729	13686
Solenopsis invicta	SOLIN	PRJNA396161	SAMN10260423	SRX4907867	SRR8080730	13686
Solenopsis invicta	SOLIN	PRJNA396161	SAMN10260422	SRX4907866	SRR8080731	13686
Solenopsis invicta	SOLIN	PRJNA396161	SAMN10260421	SRX4907865	SRR8080732	13686
Solenopsis invicta	SOLIN	PRJNA396161	SAMN10260420	SRX4907864	SRR8080733	13686
Solenopsis invicta	SOLIN	PRJNA396161	SAMN10260419	SRX4907863	SRR8080734	13686
Solanum lycopersicum	SOLLY	PRJEB6302	SAMEA2610542	ERX504793	ERR539590	4081
Solanum lycopersicum	SOLLY	PRJEB6302	SAMEA2610542	ERX504794	ERR539591	4081
Solanum lycopersicum	SOLLY	PRJEB6302	SAMEA2610542	ERX504795	ERR539592	4081
Solanum lycopersicum	SOLLY	PRJEB6302	SAMEA2610542	ERX504796	ERR539593	4081
Solanum lycopersicum	SOLLY	PRJEB6302	SAMEA2610542	ERX504797	ERR539594	4081
Solanum lycopersicum	SOLLY	PRJEB6302	SAMEA2610542	ERX504798	ERR539595	4081
Solanum lycopersicum	SOLLY	PRJEB6302	SAMEA2610542	ERX504799	ERR539596	4081
Solanum lycopersicum	SOLLY	PRJEB6302	SAMEA2610542	ERX504800	ERR539597	4081
Solanum lycopersicum	SOLLY	PRJEB6302	SAMEA2610542	ERX504801	ERR539598	4081
Stenopsyche tienmushanensis	STETI	PRJNA436868	SAMN08634672	SRX3993395	SRR7062468	1560151
Stiretrus anchorago	STIAN	PRJNA345234	SAMN05580311	SRX2485272	SRR5168443	1891344
Stiretrus anchorago	STIAN	PRJNA345234	SAMN05580311	SRX5355411	SRR8553634	1891344
Stiretrus anchorago	STIAN	PRJNA345234	SAMN05580311	SRX5679725	SRR8893571	1891344
Stiretrus anchorago	STIAN	PRJNA345234	SAMN05580311	SRX5974098	SRR9202879	1891344
Sus scrofa	SUSSC	PRJEB35180	SAMEA6141249	ERX3626774	ERR3632976	9823
Sus scrofa	SUSSC	PRJEB35180	SAMEA6141249	ERX3626775	ERR3632977	9823
Sus scrofa	SUSSC	PRJEB35180	SAMEA6141249	ERX3626776	ERR3632978	9823
Sus scrofa	SUSSC	PRJEB35180	SAMEA6245517	ERX3670317	ERR3680701	9823
Sus scrofa	SUSSC	PRJEB35180	SAMEA6245518	ERX3670318	ERR3680702	9823
Synergus japonicus	SYNJA	PRJEB13424	SAMEA3925609	ERX1425832	ERR1354357	452695
Synergus japonicus	SYNJA	PRJEB13424	SAMEA3925610	ERX1425833	ERR1354358	452695
Synergus japonicus	SYNJA	PRJEB13424	SAMEA3925611	ERX1425834	ERR1354359	452695
Synergus japonicus	SYNJA	PRJEB13424	SAMEA3925612	ERX1425835	ERR1354360	452695
Synergus japonicus	SYNJA	PRJEB13424	SAMEA3925613	ERX1425836	ERR1354361	452695
Synergus japonicus	SYNJA	PRJEB13424	SAMEA3925614	ERX1425837	ERR1354362	452695
Synergus japonicus	SYNJA	PRJEB13424	SAMEA3925615	ERX1425838	ERR1354363	452695
Synergus japonicus	SYNJA	PRJEB13424	SAMEA3925616	ERX1425839	ERR1354364	452695
Synergus japonicus	SYNJA	PRJEB13424	SAMEA3925617	ERX1425840	ERR1354365	452695
Synergus umbraculus	SYNUM	PRJEB20883	SAMEA104077543	ERX2042585	ERR1982179	331713
Synergus umbraculus	SYNUM	PRJEB20883	SAMEA104077543	ERX2042586	ERR1982180	331713
Synergus umbraculus	SYNUM	PRJEB20883	SAMEA104077543	ERX2042587	ERR1982181	331713
Synergus umbraculus	SYNUM	PRJEB20883	SAMEA104077543	ERX2042588	ERR1982182	331713
Synergus umbraculus	SYNUM	PRJEB20883	SAMEA104077543	ERX2042589	ERR1982183	331713
Synergus umbraculus	SYNUM	PRJEB20883	SAMEA104077543	ERX2042590	ERR1982184	331713
Synergus umbraculus	SYNUM	PRJEB20883	SAMEA104077543	ERX2042591	ERR1982185	331713
Synergus umbraculus	SYNUM	PRJEB20883	SAMEA104077543	ERX2042592	ERR1982186	331713
Synergus umbraculus	SYNUM	PRJEB20883	SAMEA104077543	ERX2042593	ERR1982187	331713
Synergus umbraculus	SYNUM	PRJEB20883	SAMEA104077544	ERX2042594	ERR1982188	331713
Synergus umbraculus	SYNUM	PRJEB20883	SAMEA104077544	ERX2042595	ERR1982189	331713
Synergus umbraculus	SYNUM	PRJEB20883	SAMEA104077544	ERX2042596	ERR1982190	331713
Synergus umbraculus	SYNUM	PRJEB20883	SAMEA104077544	ERX2042597	ERR1982191	331713
Synergus umbraculus	SYNUM	PRJEB20883	SAMEA104077544	ERX2042598	ERR1982192	331713
Synergus umbraculus	SYNUM	PRJEB20883	SAMEA104077544	ERX2042599	ERR1982193	331713
Synergus umbraculus	SYNUM	PRJEB20883	SAMEA104077544	ERX2042600	ERR1982194	331713
Synergus umbraculus	SYNUM	PRJEB20883	SAMEA104077544	ERX2042601	ERR1982195	331713
Synergus umbraculus	SYNUM	PRJEB20883	SAMEA104077544	ERX2042602	ERR1982196	331713
Synergus umbraculus	SYNUM	PRJEB20883	SAMEA104077545	ERX2042603	ERR1982197	331713
Synergus umbraculus	SYNUM	PRJEB20883	SAMEA104077545	ERX2042604	ERR1982198	331713
Synergus umbraculus	SYNUM	PRJEB20883	SAMEA104077545	ERX2042605	ERR1982199	331713
Synergus umbraculus	SYNUM	PRJEB20883	SAMEA104077545	ERX2042606	ERR1982200	331713
Synergus umbraculus	SYNUM	PRJEB20883	SAMEA104077545	ERX2042607	ERR1982201	331713
Synergus umbraculus	SYNUM	PRJEB20883	SAMEA104077545	ERX2042608	ERR1982202	331713
Synergus umbraculus	SYNUM	PRJEB20883	SAMEA104077545	ERX2042609	ERR1982203	331713
Synergus umbraculus	SYNUM	PRJEB20883	SAMEA104077545	ERX2042610	ERR1982204	331713
Synergus umbraculus	SYNUM	PRJEB20883	SAMEA104077545	ERX2042611	ERR1982205	331713
Synergus japonicus	SYNUM	PRJEB20883	SAMEA104077546	ERX2042612	ERR1982206	452695
Synergus japonicus	SYNUM	PRJEB20883	SAMEA104077546	ERX2042613	ERR1982207	452695
Synergus japonicus	SYNUM	PRJEB20883	SAMEA104077546	ERX2042614	ERR1982208	452695
Synergus japonicus	SYNUM	PRJEB20883	SAMEA104077546	ERX2042615	ERR1982209	452695
Synergus japonicus	SYNUM	PRJEB20883	SAMEA104077546	ERX2042616	ERR1982210	452695
Synergus japonicus	SYNUM	PRJEB20883	SAMEA104077546	ERX2042617	ERR1982211	452695
Synergus japonicus	SYNUM	PRJEB20883	SAMEA104077546	ERX2042618	ERR1982212	452695
Synergus japonicus	SYNUM	PRJEB20883	SAMEA104077546	ERX2042619	ERR1982213	452695
Synergus japonicus	SYNUM	PRJEB20883	SAMEA104077546	ERX2042620	ERR1982214	452695
Tenodera sinensis	TENSI	PRJNA564646	SAMN16697860	SRX9474694	SRR13024480	406589
Timema cristinae	TIMCR	PRJNA357256	SAMN06135417	SRX2508201	SRR5192505	61476
Timema podura	TIMPO	PRJNA371785	SAMN06311764	SRX2554845	SRR5248881	61482
Torymus auratus	TORAU	PRJEB20883	SAMEA104077547	ERX2042622	ERR1982216	714620
Torymus auratus	TORAU	PRJEB20883	SAMEA104077548	ERX2042623	ERR1982217	714620
Torymus auratus	TORAU	PRJEB20883	SAMEA104077548	ERX2042624	ERR1982218	714620
Torymus auratus	TORAU	PRJEB20883	SAMEA104077549	ERX2042625	ERR1982219	714620
Torymus auratus	TORAU	PRJEB20883	SAMEA104077549	ERX2042626	ERR1982220	714620
Torymus auratus	TORAU	PRJEB20883	SAMEA104077550	ERX2042627	ERR1982221	714620
Torymus auratus	TORAU	PRJEB20883	SAMEA104077550	ERX2042628	ERR1982222	714620
Torymus auratus	TORAU	PRJEB20883	SAMEA104077551	ERX2042629	ERR1982223	714620
Torymus auratus	TORAU	PRJEB20883	SAMEA104077551	ERX2042630	ERR1982224	714620
Torymus auratus	TORAU	PRJEB20883	SAMEA104077552	ERX2042631	ERR1982225	714620
Torymus auratus	TORAU	PRJEB20883	SAMEA104077552	ERX2042632	ERR1982226	714620
Torymus auratus	TORAU	PRJEB20883	SAMEA104077553	ERX2042633	ERR1982227	714620
Torymus auratus	TORAU	PRJEB20883	SAMEA104077553	ERX2042634	ERR1982228	714620
Torymus auratus	TORAU	PRJEB20883	SAMEA104077554	ERX2042635	ERR1982229	714620
Torymus auratus	TORAU	PRJEB20883	SAMEA104077554	ERX2042636	ERR1982230	714620
Torymus auratus	TORAU	PRJEB20883	SAMEA104077555	ERX2042637	ERR1982231	714620
Torymus auratus	TORAU	PRJEB20883	SAMEA104077555	ERX2042638	ERR1982232	714620
Torymus auratus	TORAU	PRJEB20883	SAMEA104077556	ERX2042639	ERR1982233	714620
Torymus auratus	TORAU	PRJEB20883	SAMEA104077556	ERX2042640	ERR1982234	714620
Trichogramma evanescens	TRIEV	PRJEB36429	SAMEA6503145	ERX3854494	ERR3841932	72267
Trichogramma evanescens	TRIEV	PRJEB36429	SAMEA6503143	ERX3854523	ERR3841961	72267
Trichogramma evanescens	TRIEV	PRJEB36429	SAMEA6503144	ERX3854548	ERR3841986	72267
Trichogramma evanescens	TRIEV	PRJEB36429	SAMEA6503152	ERX3854566	ERR3842004	72267
Trichogramma evanescens	TRIEV	PRJEB36429	SAMEA6503146	ERX3855169	ERR3842607	72267
Trichogramma evanescens	TRIEV	PRJEB36429	SAMEA6503151	ERX3862559	ERR3849997	72267
Trichogramma evanescens	TRIEV	PRJEB36429	SAMEA6503148	ERX3862568	ERR3850006	72267
Trichogramma evanescens	TRIEV	PRJEB36429	SAMEA6503149	ERX3862712	ERR3850124	72267
Trichogramma evanescens	TRIEV	PRJEB36429	SAMEA6503150	ERX3862713	ERR3850125	72267
Trichogramma evanescens	TRIEV	PRJEB36429	SAMEA6503147	ERX3862952	ERR3850364	72267
Trichogramma pretiosum	TRIPR	PRJNA517672	SAMN10878007	SRX5337052	SRR8534563	7493
Trichosia splendens	TRISP	PRJNA369264	SAMN06282880	SRX2528536	SRR5218407	1260884
Trichosia splendens	TRISP	PRJNA369264	SAMN06282880	SRX4634374	SRR7779254	1260884
Trichosia splendens	TRISP	PRJNA369264	SAMN06282880	SRX5679407	SRR8893252	1260884
Trichosia splendens	TRISP	PRJNA369264	SAMN06282880	SRX5904052	SRR9130100	1260884
Vespa velutina	VESVE	PRJEB22206	SAMEA5248726	ERX3341691	ERR3316181	202808
Vespa velutina	VESVE	PRJEB22206	SAMEA994721	ERX3341607	ERR3316097	202808
Vespa velutina	VESVE	PRJEB22206	SAMEA994721	ERX3341610	ERR3316100	202808
Vespa velutina	VESVE	PRJEB22206	SAMEA5248726	ERX3341692	ERR3316182	202808
Vespa velutina	VESVE	PRJEB22206	SAMEA5248726	ERX3341693	ERR3316183	202808
Vespa velutina	VESVE	PRJEB22206	SAMEA5248726	ERX3341694	ERR3316184	202808
Vespa velutina	VESVE	PRJEB22206	SAMEA994721	ERX3341608	ERR3316098	202808
Vespa velutina	VESVE	PRJEB22206	SAMEA994721	ERX3341609	ERR3316099	202808
Xenopus laevis	XENLA	PRJNA313213	SAMN04518361	SRX1619019	SRR3210959	8355
Xenopus laevis	XENLA	PRJNA313213	SAMN04518361	SRX1619020	SRR3210971	8355
Xenopus laevis	XENLA	PRJNA313213	SAMN04518361	SRX1619021	SRR3210972	8355
Xenopus laevis	XENLA	PRJNA313213	SAMN04518361	SRX1619022	SRR3210973	8355
Xenopus laevis	XENLA	PRJNA313213	SAMN04518361	SRX1619023	SRR3210974	8355
Xenopus laevis	XENLA	PRJNA313213	SAMN04518361	SRX1619024	SRR3210975	8355
Xenopus laevis	XENLA	PRJNA313213	SAMN04518361	SRX1619025	SRR3210976	8355
Xenopus laevis	XENLA	PRJNA313213	SAMN04518361	SRX1619026	SRR3210977	8355
Xenopus laevis	XENLA	PRJNA313213	SAMN04518361	SRX1619027	SRR3210978	8355
Xenos vesparum	XENVE	PRJNA274178	SAMN03323554	SRX863809	SRR1784860	31928
Xenos vesparum	XENVE	PRJNA274178	SAMN03323553	SRX862259	SRR1783225	31928
Zootermopsis nevadensis	ZOONE	PRJNA203242	SAMN02146280	SRX283798	SRR863585	136037
Zootermopsis nevadensis	ZOONE	PRJNA203242	SAMN02146280	SRX283798	SRR863586	136037
